# Supplementary material for: Protocol: a realist review of user fee exemption policies for health services in Africa
Source: PubMed Central journal article supplement — BMJ Open. 2012 Jan 24;2(1):e000706. doi: 10.1136/bmjopen-2011-000706 (PMC3269046; doi:10.1136/bmjopen-2011-000706), 2012-01-24
Supplement: bmjopen-2011-000706.draft_revisions.pdf [file bmjopen-2011-000706.draft_revisions.pdf]

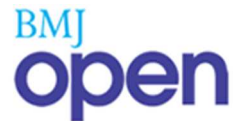

**Protocol: A realist review of user fee exemption policies for health services in Africa**

|                                 |                                                                                                                                                                                                                                                                                                                                                                                                                                                                                                                                                                                                             |
|---------------------------------|-------------------------------------------------------------------------------------------------------------------------------------------------------------------------------------------------------------------------------------------------------------------------------------------------------------------------------------------------------------------------------------------------------------------------------------------------------------------------------------------------------------------------------------------------------------------------------------------------------------|
| Journal:                        | <i>BMJ Open</i>                                                                                                                                                                                                                                                                                                                                                                                                                                                                                                                                                                                             |
| Manuscript ID:                  | bmjopen-2011-000706                                                                                                                                                                                                                                                                                                                                                                                                                                                                                                                                                                                         |
| Article Type:                   | Protocol                                                                                                                                                                                                                                                                                                                                                                                                                                                                                                                                                                                                    |
| Date Submitted by the Author:   | 29-Nov-2011                                                                                                                                                                                                                                                                                                                                                                                                                                                                                                                                                                                                 |
| Complete List of Authors:       | Robert, Emilie; Université de Montréal, Centre de recherche du Centre hospitalier de l'Université de Montréal (CR-CHUM)<br>Ridde, Valéry; Université de Montréal, Centre de recherche du Centre hospitalier de l'Université de Montréal (CR-CHUM); Université de Montréal, Département de médecine sociale et préventive<br>Marchal, Bruno; Institute of Tropical Medicine, Department of Public Health<br>Fournier, Pierre; Université de Montréal, Centre de recherche du Centre hospitalier de l'Université de Montréal (CR-CHUM); Université de Montréal, Département de médecine sociale et préventive |
| <b>Primary Subject Heading</b>: | Health policy                                                                                                                                                                                                                                                                                                                                                                                                                                                                                                                                                                                               |
| Secondary Subject Heading:      | Research methods                                                                                                                                                                                                                                                                                                                                                                                                                                                                                                                                                                                            |
| Keywords:                       | Health policy < HEALTH SERVICES ADMINISTRATION & MANAGEMENT, International health services < HEALTH SERVICES ADMINISTRATION & MANAGEMENT, PUBLIC HEALTH                                                                                                                                                                                                                                                                                                                                                                                                                                                     |
|                                 |                                                                                                                                                                                                                                                                                                                                                                                                                                                                                                                                                                                                             |

SCHOLARONE™  
Manuscripts

Only

# Protocol: A realist review of user fee exemption policies for health services in Africa

Emilie Robert<sup>1§</sup>, Valéry Ridde<sup>1,2</sup>, Bruno Marchal<sup>3§</sup>, Pierre Fournier<sup>1,2</sup>

<sup>1</sup>Centre de recherche du Centre hospitalier de l'Université de Montréal (CR-CHUM), Faculté de médecine, Université de Montréal, Pavillon Masson, 3850, rue Saint-Urbain, Montréal (Québec) H2W 1T7C, CANADA. Phone: +1.514.393.6111 (#1455)

<sup>2</sup>Département de médecine sociale et préventive, Université de Montréal, Québec, Canada

<sup>3</sup>Department of public health, Institute of Tropical Medicine, Antwerp, Belgium

§Corresponding author

Email addresses:

ER: [emilie.robert.3@umontreal.ca](mailto:emilie.robert.3@umontreal.ca)

VR: [valery.ridde@umontreal.ca](mailto:valery.ridde@umontreal.ca)

BM: [BMarchal@itg.be](mailto:BMarchal@itg.be)

PF: [pierre.fournier@umontreal.ca](mailto:pierre.fournier@umontreal.ca)

## KEYWORDS

Realist review; user fee; free care; health policy; Africa

## WORD COUNT

3,962 words

## ABSTRACT

### Background

Four years prior to the MDGs deadline, low and middle-income countries and international stakeholders are looking for evidence-based policies to improve access to health care services, especially for the most vulnerable populations. User fee exemption policies are one of the potential solutions. However the evidence is disparate and systematic reviews have failed to provide valuable lessons. This study we propose to conduct aims to produce an innovative synthesis of the available evidence on user fee exemption policies in Africa to feed the policy-making process.

### Methods

We will carry out a realist review to answer the following research question: what are the outcomes of user fee exemption policies implemented in Africa, why do they produce such outcomes, and what contextual elements come into play? This type of review aims to understand how contextual elements influence the production of outcomes through the activation of specific mechanisms, in the form of Context-Mechanism-Outcome configurations. The review will be conducted in five steps: 1) identifying with key stakeholders the mechanisms underlying user fee exemption policies to develop the analytical framework; 2) searching for and selecting primary data; 3) assessing the quality of evidence using the Mixed Method Appraisal Tool; 4) extracting the data using the analytical framework; and 5) synthesizing the data in the form of Context-Mechanism-Outcomes configurations. The output will be a middle-range theory specifying how user fee exemption policies work, for what populations, and under what circumstances.

### Discussion

This study has two main target audiences: researchers who are interested in using the realist approach and are looking for examples to implement a realist review, and

1  
2  
3  
4  
5  
6  
7  
8  
9  
10  
11  
12  
13  
14  
15  
16  
17  
18  
19  
20  
21  
22  
23  
24  
25  
26  
27  
28  
29  
30  
31  
32  
33  
34  
35  
36  
37  
38  
39  
40  
41  
42  
43  
44  
45  
46  
47  
48  
49  
50  
51  
52  
53  
54  
55  
56  
57  
58  
59  
60

policy-makers and international stakeholders looking for lessons learnt on user fee exemption policies. For the latter, a knowledge-sharing strategy involving local scientific and policy networks will be implemented.

For peer review only

## BACKGROUND

### User fee exemption in African countries

Several low- and middle-income countries (LMICs), specifically countries in Africa, have removed user fees for health services in order to improve accessibility to health care for vulnerable populations. This move follows the setback of the Bamako Initiative (BI), which was launched in 1987. Initiated in the spirit of the Alma Ata Declaration, the BI – promoted by the United Nations Children’s Fund (UNICEF) and the World Health Organization (WHO) – aimed to improve access to primary health care and essential medicines in countries where the public health sector was facing serious underfunding problems and was characterized by a strong emphasis on hospital-based medicine. Thanks to partial cost recovery through users’ financial participation and the involvement of the community, the BI was intended to improve the efficiency and the equity of health-care services in LMICs.[1]

However, utilization of health services declined sharply in the countries that subscribed to the BI, especially among vulnerable populations.[2 3] Measures to ensure that the poorest members of society had access to health services were also seldom found to be effective.[4] The principle of equity in primary health care access was therefore severely compromised.[5 6]

In an attempt to address these failures, some African countries – such as South Africa in 1994 and Uganda in 2001 – decided to eliminate user fees. Others, including Burundi, Liberia and Niger, followed suit. Concerned about the health Millennium Development Goals, many African countries now feel encouraged to provide free care at the point of service,[7 8] and more than 15 countries had implemented such policies by 2011. Several studies have been conducted on exemption policies. In the most

1  
2  
3 recent literature review, Ridde and colleagues identify 32 scientific articles on the  
4 experiences of seven African countries.[9] In addition, many evaluations have been  
5 conducted by non-governmental organizations or on behalf of African governments.  
6  
7 Although the recent proliferation of research comes in response to the urgency of the  
8 debate on user fees, it does not provide the necessary guidance for decision-makers as  
9 they try to adapt these policies to their objectives, target populations and local  
10 contexts.  
11  
12

### 13 **The challenges of evaluating complex social interventions**

14  
15 User fee exemption policies are inherently complex interventions.[10] They are  
16 dependent on the context in which they are implemented, and their implementation is  
17 not standardized.[11] They also have a strong social component, in that they are  
18 designed to promote and protect the health of populations and to reduce inequalities.  
19  
20 Evaluating complex social interventions raises further questions about scientific  
21 research methods. The experimental approach seems to have reached its limits in  
22 understanding these interventions. Because it seeks to control contextual variables and  
23 to ensure that "all else is equal," it does not capture the complex nature of  
24 interventions whose outcomes, by definition, depend on the context in which they are  
25 implemented.[12] By contrast, the constructivist approach perceives social  
26 interventions as a complex process of negotiations between different actors. Such a  
27 vision seldom recognizes the asymmetry of powers between actors in a society, and  
28 often denies the role of structures in human choices.[13] In addition, by refusing any  
29 principle of causality, this approach does not address the question of the outcomes of  
30 an intervention in relation with processes.[14] More and more authors now support a  
31 "contingent" approach, implying that the choice of methods should be guided by the  
32 research question.[12 15]  
33  
34  
35  
36  
37  
38  
39  
40  
41  
42  
43  
44  
45  
46  
47  
48  
49  
50  
51  
52  
53  
54  
55  
56  
57  
58  
59  
60

1  
2  
3 As an alternative to this methodological debate, Chen and Rossi suggest a theory-  
4 based perspective.[16] They believe that theorization allows a better understanding of  
5 how interventions, and social phenomena in general, are supposed to work. Such an  
6 approach, which focuses on "black boxes" of programs would capture the complexity  
7 of social interventions by studying how the different theoretical elements that  
8 compose them are intertwined [17 18] and by reintegrating the context as a key  
9 element in the production of outcomes. In addition, from an *Evidence-based Policy*  
10 (EBP) perspective, shedding light on the multiple logics that underlie policies would  
11 be more useful to decision-makers.  
12

13  
14 By extending the scope of *Evidence-based Medicine*, EBP meets the growing demand  
15 that political decisions be justified through lessons learned from past experiences. The  
16 theory-based approach would allow knowledge of the different contexts in which an  
17 intervention works to be broadened,[18 19] and the accurate level of abstraction with  
18 which to generalize the results of research to be achieved.[20] Thus, it would ensure  
19 the external validity of evaluation studies and make the results transferable to other  
20 contexts. By providing insights into how programs operate and can be implemented in  
21 different contexts, this type of evaluation would be better able to meet the  
22 expectations of decision-makers.[21]  
23

24  
25 Based on this approach, the realistic evaluation suggests that we set aside the  
26 traditional question of the effectiveness of interventions and instead investigate how  
27 they work.[13] The question is no longer: *Do interventions work?* But also: *How? For*  
28 *which populations? And in what contexts?*  
29

### 30 **Syntheses and systematic reviews: the tools of Evidence-based Policy**

31  
32 Two documents have been produced to inform technicians and decision-makers in  
33 charge of formulating and/or implementing exemption policies in their countries. In  
34  
35  
36  
37  
38  
39  
40  
41  
42  
43  
44  
45  
46  
47  
48  
49  
50  
51

1  
2  
3 2008, Save The Children UK (STC-UK) published a guide to help with the planning  
4 and implementation of exemption policies.[22] In 2009, UNICEF published a *Policy*  
5 *Guidance Note*,[23] based on evaluations of exemption policies conducted in several  
6 African countries.[24] These documents have limitations, however. First, the  
7 document by STC-UK is only based on available data on the Ugandan experience,  
8 which limits the scope of its arguments, especially since it specifically states that  
9 these data are not homogeneous. In addition, its recommendations are more common-  
10 sense than the result of a systematic analysis of the variables involved in the  
11 exemption processes. Finally, the recommended steps focus on macro-level planning  
12 and implementation, and leave out key elements for the success of policies of this  
13 scale, such as the mechanisms at work or the contextual elements that come into play.  
14 The UNICEF document partially complements the STC–UK guide because its  
15 recommendations come from a more in-depth analysis, addressing the issue of context  
16 and process of policy formulation more precisely. However, it is a technical "toolbox"  
17 with a relatively normative perspective. While informing decision-makers on what  
18 elements to consider in formulating policies, it does not give them any indication on  
19 how these elements interact with the context.

20  
21  
22  
23  
24  
25  
26  
27  
28  
29  
30  
31  
32  
33  
34  
35  
36  
37  
38  
39  
40  
41  
42  
43  
44  
45  
46  
47  
48  
49  
50  
51  
52  
53  
54  
55  
56  
57  
58  
59  
60

Ridde and colleagues conducted two literature reviews on exemption policies, using  
the *scoping study* method. The first review gives an outline of the scientific  
knowledge on this issue and draws attention to research needs.[25] The authors  
attempt to make some recommendations; however, this method presents a risk of  
over-interpretation of data. It also has methodological limitations: on the one hand,  
the quality of the studies was not assessed, while on the other hand, by deciding to  
focus solely on scientific publications with peer review, the authors excluded a large  
amount of contextual and informal knowledge. The objective of the second literature



1  
2  
3 review is to highlight the pressures exerted by exemption policies on health  
4 systems.[26] The criticisms to the first review also apply here. Additionally, this  
5  
6  
7 second review is not intended to guide decision-makers by responding to their  
8  
9  
10 expectations on the operation and implementation of policies. Therefore, these  
11  
12 documents are of limited interest for policy-makers and international organizations,  
13  
14 especially in a context where the idea of "*evidence-based*" policy predominates.  
15  
16 Meta-analysis and systematic reviews are the favorite tools of EBP supporters and  
17  
18 decision-makers, for the good reason that "[...] *good evidence syntheses free them up*  
19  
20 *to concentrate on the other aspects that go into policy-making [...]*".[27] A systematic  
21  
22 review was published in 2011 by Lagarde and Palmer evaluating the effectiveness of  
23  
24 different schemes of health-care funding.[28] Only randomized controlled trials,  
25  
26 interrupted time-series studies and controlled before-and-after studies were included,  
27  
28 in accordance with the EPOC (Effective Practice and Organization of Care Group of  
29  
30 the Cochrane Collaboration) method which the authors used to assess the quality of  
31  
32 research design. Based on these criteria, the researchers only included five studies, all  
33  
34 of which were deemed to be of low quality. They explain: "*We considered the*  
35  
36 *evidence on the removal of user fees to be at high risk of bias. In particular, the*  
37  
38 *presence of confounding factors (concurrent policy changes), the lack of reliability of*  
39  
40 *routine data and limited sample sizes weaken the evidence base*".[28] This systematic  
41  
42 review reveals the limitations of the traditional way of synthesizing scientific  
43  
44 knowledge when it comes to complex social interventions. Considering only  
45  
46 knowledge produced through methods limiting bias and random errors,[29] studies  
47  
48 using so-called less robust designs, including research designs used in social sciences,  
49  
50 were excluded even though they provide valuable scientific data.[30] By focusing on  
51  
52 the effectiveness of interventions, such systematic reviews do not take into account  
53  
54  
55  
56  
57  
58  
59  
60

1  
2  
3 the process and contextual elements, which allowed the interventions to produce  
4  
5 outcomes.

6  
7 The need to deal with complex social interventions has led to changes in these  
8  
9 synthesis tools.[31 32] Systematic reviews in fact failed to keep their promises in  
10  
11 terms of transferability to other more social issues.[33] New forms of reviews which  
12  
13 take into account not only qualitative data,[34] but also the combination of  
14  
15 quantitative and qualitative data, are emerging.[35] As noted by Jackson and  
16  
17 colleagues, it is no longer the hierarchy of evidence that must guide the selection of  
18  
19 studies to be included in the review, but their usefulness in answering the research  
20  
21 question.[36] As such, mixed approaches seem promising. Pope and colleagues  
22  
23 identify four mixed review approaches: the narrative approach, the thematic approach,  
24  
25 the EPPI (Evidence for Policy and Practice Information) approach, and the realistic  
26  
27 approach.[37] According to Pluye and colleagues, only the last two involve a  
28  
29 systematic review process.[38] The EPPI approach juxtaposes several reviews to  
30  
31 answer different sub-questions, which together make up a very broad main research  
32  
33 question. The final step of this type of review is to combine the results of the "sub-  
34  
35 reviews" in a meta-synthesis.[33] This process requires a significant amount of time  
36  
37 to complete and the availability of several researchers.[37] Moreover, it is said to  
38  
39 yield limited results in terms of the meta-synthesis. Proposed by Pawson in line with  
40  
41 the realistic evaluation,[13] the realist review aims to develop middle-range theories  
42  
43 that take into account how the context (C) influences mechanisms (M) to produce  
44  
45 outcomes (O).[39 40] That is what Pawson calls C-M-O configurations. It is the only  
46  
47 review that proposes a systematic integration of contextual analysis in order to better  
48  
49 understand how interventions produce outcomes.  
50  
51  
52  
53  
54  
55  
56  
57  
58  
59  
60

## METHODS

### The realist approach

The realist approach provides the possibility of identifying causal patterns underlying complex interventions.[13] Realism assumes that reality exists independently of human constructions, but that it is only perceptible through our senses.[14] This approach postulates the existence of causal patterns, regardless of our understanding. Thus, an intervention does not work in itself; it is the mechanisms that underlie it which act (or fail to act) to produce the observed outcomes. These mechanisms are influenced by the context in which the intervention is implemented. From this perspective, the replication of experiments that try to control contextual elements is futile. We should instead try to observe patterns in the production of outcomes – what Lawson calls "*demi-reg*" (quoted by Pawson, p. 22)[39] – and identify causal arrangements. This is called the "generative" vision of causality. Research aims therefore to identify and describe, in a certain context (C), the mechanisms (M) operated by the intervention to produce its outcomes (O).

The approach proposed by Pawson and Tilley is rooted in a realist perspective of social change.[13] Social phenomena are constructed both by the actions of individuals and their understanding of such phenomena – individuals who in turn are constrained and enabled by social structures. As social systems, social interventions are built from the interplay between agents and structure. We must therefore understand how the agent and the structure interact to produce what characterizes social reality. The manner in which interventions are broken down into context, mechanisms and outcomes should enhance our understanding of these social phenomena. Mechanisms should be understood as elements from the reasoning of actors facing interventions.[10] Realism in social sciences holds that demi-regs are formed from the occurrence of mechanisms: "*Realists thus think of the underlying*

1  
2  
3 *engine of social reality in terms of people's reasoning as well as the resources*  
4  
5 *available to them".[41] The context is similar to, but not limited to, the structure: it is*  
6  
7 social, cultural, historical or institutional. It is what allows or, conversely, what  
8  
9 constrains the action of agents. Indeed, actions are part of a set of social processes that  
10  
11 constitutes social reality. Outcomes are the product of the interaction of these  
12  
13 mechanisms and the context. Since outcomes are dependent on the context, they are  
14  
15 therefore not immutable laws of nature.  
16  
17 CMO configurations are the tools that help explain social change by identifying these  
18  
19 demi-regs (Table 1).[14] The goal is to refine these demi-regs by submitting them to  
20  
21 empirical testing. More precisely, the identification of demi-regs must, according to  
22  
23 Pawson, allow the development of middle-range theories, defined by Merton as  
24  
25 *"theories that lie between the minor but necessary working hypotheses that evolve in*  
26  
27 *abundance during day-to-day research and the all-inclusive systematic efforts to*  
28  
29 *develop a unified theory that will explain all the observed uniformities of social*  
30  
31 *behavior, social organization and social change".[42] Middle-range theories enable*  
32  
33 us to get to the level of abstraction needed to understand the diversity of outcomes  
34  
35 produced in different contexts.[41] The CMO framework ensures the external validity  
36  
37 of the research because it lets us move to the necessary level of abstraction for the  
38  
39 theory or theories to be useful in other contexts. Blaise and colleagues thus speak of  
40  
41 the "plausibility" of the predictive power of these theories.[12] They explain that  
42  
43 middle-range theories, rather than interventions per se, are what one should try to  
44  
45 replicate in other contexts by improving the design of interventions based on similar  
46  
47 mechanisms.  
48  
49  
50  
51  
52  
53  
54  
55  
56  
57  
58  
59  
60

**Table 1 - Key concepts of the realist approach, adapted from Ridde and colleagues[10]**

|                            |                                                                                                                                                                   |
|----------------------------|-------------------------------------------------------------------------------------------------------------------------------------------------------------------|
| <b>Mechanism</b>           | Element of the reasoning of the actor facing an intervention. A mechanism: 1) is generally hidden; 2) is sensitive to context variations; 3) produces outcomes.   |
| <b>CMO configuration</b>   | Conceptual tool to link the elements of context, mechanisms and outcomes of an intervention.                                                                      |
| <b>Intervention theory</b> | Set of hypotheses that explain how and why the intervention is expected to produce outcomes. It can be broken down in the form of one or more CMO configurations. |
| <b>Middle-range theory</b> | Level of theoretical abstraction that provides an explanation of semi-regularities in the context-mechanism-outcome interactions of a set of interventions.       |

The demi-regs are explained through expanding the conceptual vision, that is moving from a descriptive structure to an explanatory one: "[...] *theory-building moves up and down a ladder of abstraction*".[41] By observing the mechanisms underlying user fee exemption policies in different contexts, it should be possible to see the appearance of demi-regs in the outcomes. The demi-regs can then be synthesized in a typology of "context - mechanism - outcomes" (CMO) families.[18]

### **Research questions**

The following research question, broken down into three specific questions, guides the research: what are the outcomes of user fee exemption policies implemented in Africa, why do they produce such outcomes, and what contextual elements come into play?

### **Study design**

1  
2  
3 A systematic realist review such as that proposed by Pawson and colleagues will be  
4 carried out.[39 40] This will make it possible to integrate knowledge on the  
5 experiences of at least 15 African countries. The study will be conducted in five steps.  
6  
7 The process adopted for this research will not be linear but iterative, based on the  
8 course of action proposed by Pawson.[39]  
9

10  
11  
12  
13  
14 *Step 1: Identifying mechanisms operated by exemption policies.* This step, which is  
15 similar to a logic analysis,[43] has two specific objectives: 1) to highlight the theory  
16 of exemption policies, i.e. how they are supposed to work, for which recipients and  
17 with what anticipated outcomes; and 2) to identify the contextual elements  
18 (institutional, organizational, socio-economic, cultural) that influence the way  
19 mechanisms activated by exemption policies are expected to operate and produce  
20 outcomes. It is therefore a matter of identifying the mechanisms that form the basis of  
21 exemption policies. We will first reconstruct the logic of the issue that these policies  
22 aim to solve (namely the financial barrier to health-care access), and second,  
23 reconstruct the intervention theory of these policies. This will be done in an  
24 exploratory, non-exhaustive and inductive way. Two sources of information will be  
25 sought: 1) official and scientific documentation around the main concepts of  
26 exemption policies, including the determinants of health-care access and equity, and  
27 2) key actors' experiences. These actors (decision-makers and health managers from  
28 Mali, Burkina Faso and Niger) will participate in developing these models. Then, a  
29 framework will be formulated based on the context-mechanism-outcome principle.  
30 This framework will be discussed and validated with local and international  
31 exemption policy experts.  
32  
33  
34  
35  
36  
37  
38  
39  
40  
41  
42  
43  
44  
45  
46  
47  
48  
49  
50  
51  
52

53  
54 *Step 2: Researching primary data.* With regard to the scientific data, the following  
55 document search strategy will be used: 1) the Ovid Medline, Embase, Popline, HMIC,  
56  
57  
58  
59  
60

1  
2  
3 Web of Knowledge, African Healthline, AJOL (African Journals On Line), EconLit,  
4  
5 Business Source Premier databases will be used, as well as the websites of journals  
6  
7 that regularly publish articles on health system financing, such as Health Policy and  
8  
9 Planning, WHO Bulletin, and Social Science and Medicine; 2) combinations of key  
10  
11 words in English and French (Table 2) and their truncations will be entered in these  
12  
13 databases; 3) the relevance of the retrieved documents will be assessed according to  
14  
15 exclusion and inclusion criteria (Table 3); 4) bibliographic references from the  
16  
17 included documents will be reviewed using the "snowballing" technique to identify  
18  
19 additional documents; 5) the ISI Web of Science database will be used to identify  
20  
21 articles citing the included documents. Articles that address the context, mechanisms  
22  
23 or outcomes may be included.  
24  
25  
26  
27

28  
29 **Table 2 - List of key words for the document search strategy**

| AND       |            |            | -OR-        | Themes and expressions |              |
|-----------|------------|------------|-------------|------------------------|--------------|
| -OR-      | -OR-       | -OR-       |             | (gray literature)      |              |
| User fee* | Aboli*     | Developing | Free        | Health                 | Health care  |
| User      | Exempt*    | countr*    | healthcare  | services               | costs        |
| charge*   | Waiv*      | Africa*    | Free care   | accessibility          | Health       |
| Cost-     | Remov*     | Low income | Free        | Health                 | insurance    |
| sharing   | End*       | countr*    | service*    | facilities             | Health       |
| Cost-     | Discontin* | Middle     | Free health | Health                 | expenditure* |
| recovery  | Free       | income     | care        | disparities            | Health       |
| Out-of-   |            | countr*    | Universal   | Health                 | financing    |
| pocket    |            | LMIC*      | access to   | policy                 | National     |
|           |            |            | healthcare  | Health                 | health       |
|           |            |            | Universal   | equity                 | programs     |

|  |  |  |                          |  |  |
|--|--|--|--------------------------|--|--|
|  |  |  | access to<br>health care |  |  |
|--|--|--|--------------------------|--|--|

Because gray literature is a relevant source of information for realist reviews, evaluation reports or policy documents published by African governments, international organizations, non-governmental organizations and consultancy firms, as well as dissertations and theses, may also be included. Our contacts with networks of researchers, decision-makers and other stakeholders in North America, Europe and Africa will facilitate the collection of these documents. The Database on African Theses and Dissertations (DATAD) and Dissertations and Thesis will also be searched.

The search for new documents will end at the point of saturation, i.e. when the research yields no more new sources of information. References will be compiled in Mendeley, a reference manager.

### Table 3 - Inclusion and exclusion criteria

|                                                                                                                                                                                                                                                                                                                                                                                                                                                                         |
|-------------------------------------------------------------------------------------------------------------------------------------------------------------------------------------------------------------------------------------------------------------------------------------------------------------------------------------------------------------------------------------------------------------------------------------------------------------------------|
| <p><b>Inclusion criteria:</b></p> <ul style="list-style-type: none"> <li>• The document's main focus is health.</li> <li>• The document deals with at least one African country.</li> <li>• The document addresses the issue of user fee exemption in the health sector<br/>OR the research takes place in the context of user fee exemption in the health sector.</li> <li>• The user fee exemption policy dealt with in the document is a national policy.</li> </ul> |
| <p><b>Exclusion criteria:</b></p> <ul style="list-style-type: none"> <li>• The document's main theme is not health.</li> </ul>                                                                                                                                                                                                                                                                                                                                          |



- The document does not deal with at least one African country.
- The document addresses a different issue than the issue of user fee exemption in the health sector.
- The document focuses on user fee exemption in the context of cost recovery policies (waivers).
- The document focuses on user fee exemption as part of a program run by a non-governmental organization.

*Step 3: Assessing the quality of studies.* Unlike traditional systematic reviews, there is no need to assess study designs based on the hierarchy of evidence in a realist review. Quality assessment is done instead in a heuristic perspective to enrich the CMO configurations and should answer the question: "*Is this study good enough to provide some evidence that will contribute to the synthesis?*"[39] Each study should be assessed according to how it clarifies the configurations. Therefore, the unit of analysis is not the study itself, but fragments of information that are produced.[44] However, this approach does not ensure a transparent selection of articles. Some authors have assessed the methodological quality of the articles in their realist review, but failed to specify which tools they used.[45 46] The Mixed Method Appraisal Tool (MMAT) proposed by Pluye and colleagues[47] seems an appropriate compromise between the need for a rigorous and transparent quality assessment and the need to consider the data according to their relevance for the development of middle-range theories. Indeed, this tool makes it possible to describe the methodology of qualitative, quantitative and mixed studies based on 19 separate items. For this review, studies considered to be of too low quality may be excluded (the minimum quality standard will be determined considering the overall quality of the studies). To

1  
2  
3 facilitate this process, a summary table will specify the authors, objectives, type of  
4  
5 study, different methodological aspects, conclusions and assessment made according  
6  
7 to the MMAT.  
8

9  
10 *Step 4: Extracting the data.* The documents included in the review will be compiled  
11  
12 into the QDA Miner<sup>®</sup> software to facilitate their organization and analysis. This  
13  
14 software can encode and annotate a large number of documents, extract relevant data  
15  
16 and link emerging themes. The analytical framework developed in step 1 will be used  
17  
18 to analyze the documents and will be further specified in an iterative manner so as to  
19  
20 integrate new explanatory elements. More specifically, data from which new  
21  
22 categories are created and differences between categories will be reported.  
23

24  
25 *Step 5: Synthesizing the data.* Each primary study will be "*inspected for evidence,*  
26  
27 *according to how it supports, weakens, modifies, supplements, reinterprets or*  
28  
29 *refocuses the preliminary theory*".[39] By applying, completing and clarifying the  
30  
31 analytical framework, we can take a critical look at the contribution of each study to  
32  
33 the initial theory. It will thus be possible to specify configuration elements (CMO)  
34  
35 and develop a middle-range theory. This process will follow the abductive approach  
36  
37 that Blom and Morén, citing Danermark, explain: "*Abduction means that single events*  
38  
39 *or occurrences – by means of concepts, theory and models – are described and*  
40  
41 *interpreted as expression of more general phenomena*".[48] Each study will help  
42  
43 clarify or reformulate the CMO configurations in order to take into account potential  
44  
45 contradictory elements. The middle-range theory will finally be put into words, as  
46  
47 well as modeled to highlight the links between contextual elements, mechanisms and  
48  
49 outcomes.  
50  
51  
52

#### 53 54 **Internal and external validity**

55  
56  
57  
58  
59  
60

1  
2  
3 The internal validity of the research is ensured by the in-depth study of the theoretical  
4 articulation of user fee exemption policies. The construction of explanations so as to  
5 make "sense" of exemption policies, through an iterative process between empirical  
6 data and construction of CMO configurations, also contributes to strengthening  
7 internal validity. The external validity of the research stems from the principle of  
8 explanation discussed above, as well as the approach based on the CMO  
9 configurations.[49] Taking the context into account in the production of outcomes  
10 increases the generalization potential of the study. Indeed, developing middle-range  
11 theories allows a better understanding of the elements involved in the production of  
12 outcomes. A research logbook will document the research approach step by step,  
13 along with any adjustments and methodological choices made. This logbook will  
14 contain methodological as well as theoretical notes. This will help ensure the  
15 reliability of the research results.[50] A glossary will be prepared to clarify the  
16 terminology used in the research.  
17  
18  
19  
20  
21  
22  
23  
24  
25  
26  
27  
28  
29  
30  
31  
32  
33  
34

## 35 **DISCUSSION**

### 36 **Importance of the research**

37  
38 The results of the proposed research may be useful to African decision-makers who  
39 would be willing to implement exemption policies in their countries and to  
40 government and international agencies that wish to support them. More than 30  
41 countries have adopted the BI and are thus potential users of the results of this  
42 research, especially in the context of an emerging consensus around these issues  
43 within the international community.[8 51] In addition, this study is part of a broader  
44 research movement initiated around new practices of user fee exemptions in LMICs,  
45 but which mainly focuses on outcomes at the expense of other pieces of knowledge  
46  
47  
48  
49  
50  
51  
52  
53  
54  
55  
56  
57  
58  
59  
60

1  
2  
3 that will be studied within this research. Once the review has been completed, a  
4  
5 realistic evaluation could be undertaken to test the new middle-range theory.  
6

7  
8 Few researchers, including those in the field of public health, have used the realist  
9  
10 approach to synthesize the literature. This is doubtless due to both methodological and  
11  
12 conceptual challenges.[10] A secondary objective is therefore to pursue the reflections  
13  
14 initiated on the realist review in order to facilitate its use for the benefit of research on  
15  
16 health policies.[52]  
17

### 18 **Knowledge-sharing strategy**

19  
20 To promote the use of the knowledge generated through this research, three activities  
21  
22 will be implemented. First, a restitution workshop will be organized at the end of the  
23  
24 research with key stakeholders. Then, the RESAO,[53] a West African network of  
25  
26 researchers and decision-makers, will be involved in the research. Its role will be to  
27  
28 mobilize key informants at step 1 and for the restitution workshop, and also to provide  
29  
30 technical expertise on exemption policies. Finally, a policy brief in French and in  
31  
32 English presenting the research results will be produced and broadcast via the RESAO  
33  
34 and the Financial Access to Health Services Community of Practice.[54]  
35  
36  
37

### 38 **Ethical considerations**

39  
40 The study has been approved by the Ethics Committee of the CHUM Research  
41  
42 Centre. It received funding from the Canadian Institutes of Health Research.  
43  
44  
45  
46  
47  
48  
49  
50  
51  
52  
53  
54  
55  
56  
57  
58  
59  
60

## ACKNOWLEDGEMENTS

ER is a Ph.D. candidate in public health at Montreal University (Canada), and a fellow of the Strategic Training Program in Global Health Research, a partnership of the Canadian Institutes of Health Research and the Québec Population Health Research Network. VR is a New Investigator of the Canadian Institutes for Health Research.

## COMPETING INTERESTS

None.

## FUNDING

The project is funded by the Canadian Institutes for Health Research under the financing opportunity « Knowledge synthesis ».

## Reference list

- 1 Knippenberg R, Alihonou E, Soucat A, et al. Implementation of the Bamako Initiative: Strategies in Benin and Guinea. *Int J Health Plann Manage* 1997;12(S1):S29-S47 doi:10.1002/(SICI)1099-1751(199706)12:1+<S29::AID-HPM465>3.0.CO;2-U
- 2 Gilson L, Mills A. Health sector reforms in sub-Saharan Africa: lessons of the last 10 years. *Health Policy* 1995;32(1-3):215-43
- 3 James C, Hanson K, McPake B, et al. To Retain or Remove User Fees? Reflections on the current debate. *Appl Health Econ Health Policy* 2006;5(3):137-53
- 4 Laterveer L, Munga M, Shwerzel P. Equity implications of health sector user fees in Tanzania. Do we retain the user fee or do we set the future user f(r)ee? Leusden: ETC Crystal for REPOA / Partners in International Health, 2004:36.
- 5 Gilson L. The lessons of user fee experience in Africa. *Health Policy Plan* 1997;12(4):273-85
- 6 Ridde V, Girard JE. Douze ans après l'initiative de Bamako : constats et implications politiques pour l'équité d'accès aux services de santé des indigents africains. *Santé Publique* 2004;1(41):37-51 doi:10.3917/spub.041.0037
- 7 Sambo LG, Kirigia JM, Ki-Zerbo G. Perceptions and viewpoints on proceedings of the Fifteenth Assembly of Heads of State and Government of the African Union Debate on Maternal, Newborn and Child Health and

- 1  
2  
3 Development, 25–27 July 2010, Kampala, Uganda. *BMC Proc* 2011;5(Suppl  
4  
5 5)(S1). <http://www.biomedcentral.com/1753-6561/5/S5/S1> (accessed 29  
6  
7 November 2011). doi:10.1186/1753-6561-5-S5-S1  
8  
9  
10 8 Commission for Africa. Still our common interest: Commission for Africa  
11  
12 Report 2010. In: Commission for Africa, editor. *Commission for Africa*.  
13  
14 London: Commission for Africa, 2010:68.  
15  
16 9 Ridde V, Robert E, Meessen B. Les pressions exercées par l'abolition du  
17  
18 paiement des soins sur les systèmes de santé. In: Health systems financing,  
19  
20 editor. *World Health Report (2010) Background Paper, 18*. Geneva:  
21  
22 World Health Organization, 2010:p.43.  
23  
24  
25 10 Ridde V, Robert E, Guichard A, et al. L'approche Realist à l'épreuve du  
26  
27 réel : de quelques défis méthodologiques. *Canadian Journal of Program*  
28  
29 *Evaluation* 2012;26(3)  
30  
31  
32 11 Egan M, Bambra C, Petticrew M, et al. Reviewing evidence on complex  
33  
34 social interventions: appraising implementation in systematic reviews of  
35  
36 the health effects of organisational-level workplace interventions. *J*  
37  
38 *Epidemiol Community Health* 2009;63(1):4-11  
39  
40 doi:10.1136/jech.2007.071233 [published Online First: 21 August 2008  
41  
42  
43 12 Blaise P, Marchal B, Lefèvre P, et al. Au-delà des méthodes  
44  
45 expérimentales, l'approche réaliste en évaluation. In: Potvin L, Moquet M-  
46  
47 J, Jones CM, eds. *Guide d'aide à l'action : inégalités sociales de santé*.  
48  
49 Saint-Denis: Institut national de prévention et d'éducation pour la santé  
50  
51 2010:285-96.  
52  
53  
54 13 Pawson R, Tilley N. *Realistic Evaluation*. London: Sage Publications 1997.  
55  
56  
57  
58  
59  
60

- 1  
2  
3 14 Julnes G, Mark MM. Evaluation as Sensemaking: Knowledge Construction  
4 in a Realist World. In: Henry GT, Julnes G, Mark MM, eds. *Realist*  
5 *Evaluation: An Emerging Theory in Support of Practice*. San Francisco:  
6 New Directions for Evaluation (no.78) 1998:33-52.  
7  
8  
9  
10  
11 15 Chen HT. The Roots of Theory-Driven Evaluation. Current Views and  
12 Origins. In: Alkin MC, ed. *Evaluation roots. Tracing Theorists' Views and*  
13 *Influences*. London: Sage Publications 2004:132-52.  
14  
15  
16  
17  
18 16 Chen H-T, Rossi PH. The Multi-Goal, Theory-Driven Approach to  
19 Evaluation: A Model Linking Basic and Applied Social Science. *Social*  
20 *Forces* 1980;59(1):106-22  
21  
22  
23  
24  
25 17 Stame N. Theory-Based Evaluation and Types of Complexity. *Evaluation*  
26 2004;10(1):58-76 doi:10.1177/1356389004043135  
27  
28  
29  
30 18 Pawson R. Nothing as practical as Good Theory. *Evaluation*  
31 2003;9(4):471-90 doi:10.1177/1356389003094007  
32  
33  
34 19 Pawson R, Sridharan S. Theory-driven evaluation of public health  
35 programs. In: Killoran A, Mike K, eds. *Evidence-based Public Health:*  
36 *Effectiveness and efficiency*. New York: Oxford University Press 2010:43-  
37 62.  
38  
39  
40  
41  
42  
43 20 Chen H-T. Generalization Evaluation. In: Chen H-T, ed. *Theory-driven*  
44 *Evaluation*. Newbury Park: Sage Publications 1990:219-54.  
45  
46  
47 21 Chen H-T. Theory-driven Evaluations: Need, Difficulties, and Options.  
48 *American Journal of Evaluation* 1994;15(1):79-82  
49 doi:10.1177/109821409401500109  
50  
51  
52  
53  
54 22 McPake B, Schmidt A, Araujo E, et al. Freeing up Healthcare. A guide to  
55 removing user fees. London: Save The Children UK, 2008:44.  
56  
57  
58  
59  
60



- 1  
2  
3 23 Meessen B. Removing User Fees in the Health Sector in Low-Income  
4  
5 Countries: A Policy Guidance Note for Programme Managers. In:  
6  
7 UNICEF, editor. *Health Section Working Paper*. New York: UNICEF,  
8  
9 2009:38.  
10  
11  
12 24 Meessen B, Hercot D, Noirhomme M, et al. Removing user fees in the  
13  
14 health sector: a review of policy processes in six sub-Saharan African  
15  
16 countries. *Health Policy Plan* 2011;26(Suppl 2):ii16-ii29  
17  
18 doi:10.1093/heapol/czr062  
19  
20  
21 25 Ridde V, Morestin F. A scoping review of the literature on the abolition of  
22  
23 user fees in healthcare services in Africa. *Health Policy Plan*  
24  
25 2011;26(1):1-11 doi:10.1093/heapol/czq021 [published Online First: 14  
26  
27 June 2010  
28  
29  
30 26 Ridde V, Robert E, Meessen B. Les pressions exercées par l'abolition du  
31  
32 paiement des soins sur les systèmes de santé. In: WHO Department of  
33  
34 Health System Financing, editor. *Background Paper for the World Health*  
35  
36 *Report 2010*,. Geneva: WHO, 2010:p.43.  
37  
38  
39 27 Sheldon T. Making evidence synthesis more useful for management and  
40  
41 policy-making. *J Health Serv Res Policy* 2005;10(S1):1-5  
42  
43 doi:10.1258/1355819054308521  
44  
45  
46 28 Lagarde M, Palmer N. The impact of user fees on access to health services  
47  
48 in low- and middle-income countries. *Cochrane Database Syst Rev* 2011  
49  
50 Apr 13(4). <http://dx.doi.org/10.1002/14651858.CD009094> (accessed 29  
51  
52 November 2011). doi:10.1002/14651858.CD009094  
53  
54  
55  
56  
57  
58  
59  
60

- 1  
2  
3 29 Cook DJ, Mulrow CD, Haynes RB. Systematic Reviews: Synthesis of Best  
4  
5 Evidence for Clinical Decisions. *Ann Intern Med* 1997;126(5):376-80  
6  
7 doi:10.1059/0003-4819-126-5-199703010-00006  
8  
9  
10 30 Gilson L, Hanson K, Sheikh K, et al. Building the Field of Health Policy  
11  
12 and Systems Research: Social Science Matters. *PLoS Med*  
13  
14 2011;8(8):e1001079 doi:10.1371/journal.pmed.1001079 [published Online  
15  
16 First: 23 August 2011  
17  
18 31 Shepperd S, Lewin S, Straus S, et al. Can We Systematically Review  
19  
20 Studies That Evaluate Complex Interventions? *PLoS Med* 2009 Aug  
21  
22 11;6(8). <http://dx.plos.org/10.1371/journal.pmed.1000086> (accessed 29  
23  
24 November 2011). doi:10.1371/journal.pmed.1000086  
25  
26  
27 32 Petticrew M. Systematic reviews in public health: old chestnuts and new  
28  
29 challenges. *Bull World Health Organ* 2009;87(3):163-63A  
30  
31 doi:10.2471/BLT.09.063719  
32  
33  
34 33 White DG. Evaluating evidence and making judgements of study quality:  
35  
36 loss of evidence and risks to policy and practice decisions. *Critical Public*  
37  
38 *Health* 2001;11(1):3 - 17 doi:10.1080/09581590010028228  
39  
40  
41 34 Barnett-Page E, Thomas J. Methods for the synthesis of qualitative  
42  
43 research: a critical review. *BMC Med Res Methodol* 2009 August 11;9(59).  
44  
45 <http://www.biomedcentral.com/1471-2288/9/59> (accessed 29 November  
46  
47 2011). doi:10.1186/1471-2288-9-59  
48  
49  
50 35 Dixon-Woods M, Agarwal S, Jones D, et al. Synthesising qualitative and  
51  
52 quantitative evidence: a review of possible methods. *J Health Serv Res*  
53  
54 *Policy* 2005;10(1):45-53  
55  
56  
57  
58  
59  
60

- 1  
2  
3 36 Jackson N, Waters E, Guidelines for Systematic Reviews of Health  
4  
5 Promotion and Public Health Interventions Taskforce. The challenges of  
6  
7 systematically reviewing public health interventions. *J Public Health (Oxf)*  
8  
9 2004;26(3):303-07 doi:10.1093/pubmed/fdh164  
10  
11  
12 37 Pope C, Mays N, Popay J. *Synthesizing Qualitative and Quantitative*  
13  
14 *Health Evidence: A guide to methods*. Maidenhead: McGraw-Hill  
15  
16 Education 2007.  
17  
18  
19 38 Pluye P, Gagnon MP, Griffiths F, et al. A scoring system for appraising  
20  
21 mixed methods research, and concomitantly appraising qualitative,  
22  
23 quantitative and mixed methods primary studies in Mixed Studies  
24  
25 Reviews. *Int J Nurs Stud* 2009;46(4):529-46 doi:S0020-7489(09)00014-5  
26  
27 [pii]10.1016/j.ijnurstu.2009.01.009 [published Online First: 23 February  
28  
29 2009  
30  
31  
32 39 Pawson R. *Evidence-based Policy. A Realist Perspective*. London: Sage  
33  
34 Publications 2006.  
35  
36  
37 40 Pawson R, Greenhalgh T, Harvey G, et al. Realist review – a new method  
38  
39 of systematic review designed for complex policy interventions. *J Health*  
40  
41 *Serv Res Policy* 2005;10(S1):21-34 doi:10.1258/1355819054308530  
42  
43  
44 41 Pawson R. Middle-range realism. *European Journal of Sociology*  
45  
46 2000;41(2):283-325 doi:10.1017/S0003975600007050  
47  
48  
49 42 Merton RK. On sociological theories of the middle range. In: Merton RK,  
50  
51 ed. *Social theory and social structure*. New York: Free Press 1968:39-72.  
52  
53  
54 43 Rossi PH, Lipsey MW, Freeman HE. Expressing and Assessing Program  
55  
56 Theory. In: Rossi PH, ed. *Evaluation: A Systematic Approach*. Thousand  
57  
58 Oaks: Sage 2004:133-52.  
59  
60

- 1  
2  
3 44 Pawson R. Digging for nuggets: how 'bad' research can yield 'good'  
4  
5 evidence. *Realist Synthesis: Supplementary reading 6*, 2006:15.  
6  
7 45 Clamp S, Keen J. Electronic health records: Is the evidence base any use?  
8  
9  
10 *Med Inform Internet Med* 2007 Mar;32(1).  
11  
12 <http://www.ingentaconnect.com/content/apl/tmif/2007/00000032/00000001/art00002> (accessed 28 November 2011).  
13  
14  
15  
16 doi:10.1080/14639230601097903  
17  
18 46 Dieleman M, Gerretsen B, van der Wilt GJ. Human resource management  
19  
20 interventions to improve health workers' performance in low and middle  
21  
22 income countries: a realist review. *Health Res Policy Syst* 2009 Apr  
23  
24 17;7(7). <http://www.health-policy-systems.com/content/7/1/7> (accessed 29  
25  
26 November 2011). doi:10.1186/1478-4505-7-7  
27  
28  
29 47 Pluye P, Robert E, Cargo M, et al. Proposal: A mixed methods appraisal  
30  
31 tool for systematic mixed studies reviews. Montréal: McGill University,  
32  
33 2011.  
34  
35 48 Blom B, Morén S. Analysis of generative mechanisms. *Journal of Critical*  
36  
37 *Realism* 2011;10(1):60-79  
38  
39 49 Chen H-T, Rossi PH. The theory-driven approach to validity. *Evaluation*  
40  
41 *and Program Planning* 1987;10(1):95-103 doi:10.1016/0149-  
42  
43 7189(87)90025-5  
44  
45  
46 50 Devers KJ. How will we know "good" qualitative research when we see it?  
47  
48 Beginning the dialogue in health services research. *Health Serv Res*  
49  
50 1999;34(5):1153-88  
51  
52  
53  
54  
55  
56  
57  
58  
59  
60

- 1  
2  
3 51 Yates R. Universal health care and the removal of user fees. *Lancet*  
4  
5 2009;373(9680):2078-81 doi:10.1016/S0140-6736(09)60258-0 [published  
6  
7 Online First: 9 April 2009  
8  
9  
10 52 Greenhalgh T, Wong G, Westhorp G, et al. Protocol - realist and meta-  
11  
12 narrative evidence synthesis: Evolving Standards (RAMESES). *BMC Med*  
13  
14 *Res Methodol* 2011 Aug 16;11(115). [http://www.biomedcentral.com/1471-](http://www.biomedcentral.com/1471-2288/11/115)  
15  
16 [2288/11/115](http://www.biomedcentral.com/1471-2288/11/115) (accessed 29 November 2011). doi:10.1186/1471-2288-11-  
17  
18 115  
19  
20  
21 53 RESAO. Bienvenue sur le site de RESAO. In: RESAO, editor. RESAO ed:  
22  
23 RESAO, 2011.  
24  
25 54 FACOP. About FACOP, 2011.  
26  
27  
28  
29  
30  
31  
32  
33  
34  
35  
36  
37  
38  
39  
40  
41  
42  
43  
44  
45  
46  
47  
48  
49  
50  
51  
52  
53  
54  
55  
56  
57  
58  
59  
60



**Protocol: A realist review of user fee exemption policies for health services in Africa**

|                                 |                                                                                                                                                                                                                                                                                                                                                                                                                                                                                                                                                                                                             |
|---------------------------------|-------------------------------------------------------------------------------------------------------------------------------------------------------------------------------------------------------------------------------------------------------------------------------------------------------------------------------------------------------------------------------------------------------------------------------------------------------------------------------------------------------------------------------------------------------------------------------------------------------------|
| Journal:                        | <i>BMJ Open</i>                                                                                                                                                                                                                                                                                                                                                                                                                                                                                                                                                                                             |
| Manuscript ID:                  | bmjopen-2011-000706.R1                                                                                                                                                                                                                                                                                                                                                                                                                                                                                                                                                                                      |
| Article Type:                   | Protocol                                                                                                                                                                                                                                                                                                                                                                                                                                                                                                                                                                                                    |
| Date Submitted by the Author:   | 13-Dec-2011                                                                                                                                                                                                                                                                                                                                                                                                                                                                                                                                                                                                 |
| Complete List of Authors:       | Robert, Emilie; Université de Montréal, Centre de recherche du Centre hospitalier de l'Université de Montréal (CR-CHUM)<br>Ridde, Valéry; Université de Montréal, Centre de recherche du Centre hospitalier de l'Université de Montréal (CR-CHUM); Université de Montréal, Département de médecine sociale et préventive<br>Marchal, Bruno; Institute of Tropical Medicine, Department of Public Health<br>Fournier, Pierre; Université de Montréal, Centre de recherche du Centre hospitalier de l'Université de Montréal (CR-CHUM); Université de Montréal, Département de médecine sociale et préventive |
| <b>Primary Subject Heading</b>: | Health policy                                                                                                                                                                                                                                                                                                                                                                                                                                                                                                                                                                                               |
| Secondary Subject Heading:      | Research methods                                                                                                                                                                                                                                                                                                                                                                                                                                                                                                                                                                                            |
| Keywords:                       | Health policy < HEALTH SERVICES ADMINISTRATION & MANAGEMENT, International health services < HEALTH SERVICES ADMINISTRATION & MANAGEMENT, PUBLIC HEALTH                                                                                                                                                                                                                                                                                                                                                                                                                                                     |
|                                 |                                                                                                                                                                                                                                                                                                                                                                                                                                                                                                                                                                                                             |

SCHOLARONE™  
Manuscripts

Only

# Protocol: A realist review of user fee exemption policies for health services in Africa

Emilie Robert<sup>1§</sup>, Valéry Ridde<sup>1,2</sup>, Bruno Marchal<sup>3§</sup>, Pierre Fournier<sup>1,2</sup>

<sup>1</sup>Centre de recherche du Centre hospitalier de l'Université de Montréal (CR-CHUM), Faculté de médecine, Université de Montréal, Pavillon Masson, 3850, rue Saint-Urbain, Montréal (Québec) H2W 1T7C, CANADA. Phone: +1.514.393.6111 (#1455)

<sup>2</sup>Département de médecine sociale et préventive, Université de Montréal, Québec, Canada

<sup>3</sup>Department of public health, Institute of Tropical Medicine, Antwerp, Belgium

<sup>§</sup>Corresponding author

Email addresses:

ER: [emilie.robert.3@umontreal.ca](mailto:emilie.robert.3@umontreal.ca)

VR: [valery.ridde@umontreal.ca](mailto:valery.ridde@umontreal.ca)

BM: [BMarchal@itg.be](mailto:BMarchal@itg.be)

PF: [pierre.fournier@umontreal.ca](mailto:pierre.fournier@umontreal.ca)

## KEYWORDS

Realist review; user fee; free care; health policy; Africa

## WORD COUNT

3,962 words

## ABSTRACT

### Background

Four years prior to the MDGs deadline, low and middle-income countries and international stakeholders are looking for evidence-based policies to improve access to health care services, especially for the most vulnerable populations. User fee exemption policies are one of the potential solutions. However the evidence is disparate and systematic reviews have failed to provide valuable lessons. This study we propose to conduct aims to produce an innovative synthesis of the available evidence on user fee exemption policies in Africa to feed the policy-making process.

### Methods

We will carry out a realist review to answer the following research question: what are the outcomes of user fee exemption policies implemented in Africa, why do they produce such outcomes, and what contextual elements come into play? This type of review aims to understand how contextual elements influence the production of outcomes through the activation of specific mechanisms, in the form of Context-Mechanism-Outcome configurations. The review will be conducted in five steps: 1) identifying with key stakeholders the mechanisms underlying user fee exemption policies to develop the analytical framework; 2) searching for and selecting primary data; 3) assessing the quality of evidence using the Mixed Method Appraisal Tool; 4) extracting the data using the analytical framework; and 5) synthesizing the data in the form of Context-Mechanism-Outcomes configurations. The output will be a middle-range theory specifying how user fee exemption policies work, for what populations, and under what circumstances.

### Discussion

This study has two main target audiences: researchers who are interested in using the realist approach and are looking for examples to implement a realist review, and



1  
2  
3  
4  
5  
6  
7  
8  
9  
10  
11  
12  
13  
14  
15  
16  
17  
18  
19  
20  
21  
22  
23  
24  
25  
26  
27  
28  
29  
30  
31  
32  
33  
34  
35  
36  
37  
38  
39  
40  
41  
42  
43  
44  
45  
46  
47  
48  
49  
50  
51  
52  
53  
54  
55  
56  
57  
58  
59  
60

policy-makers and international stakeholders looking for lessons learnt on user fee exemption policies. For the latter, a knowledge-sharing strategy involving local scientific and policy networks will be implemented.

For peer review only

## BACKGROUND

### User fee exemption in African countries

Several low- and middle-income countries (LMICs), specifically countries in Africa, have removed user fees for health services in order to improve accessibility to health care for vulnerable populations. This move follows the setback of the Bamako Initiative (BI), which was launched in 1987. Initiated in the spirit of the Alma Ata Declaration, the BI – promoted by the United Nations Children’s Fund (UNICEF) and the World Health Organization (WHO) – aimed to improve access to primary health care and essential medicines in countries where the public health sector was facing serious underfunding problems and was characterized by a strong emphasis on hospital-based medicine. Thanks to partial cost recovery through users’ financial participation and the involvement of the community, the BI was intended to improve the efficiency and the equity of health-care services in LMICs.[1]

However, utilization of health services declined sharply in the countries that subscribed to the BI, especially among vulnerable populations.[2 3] Measures to ensure that the poorest members of society had access to health services were also seldom found to be effective.[4] The principle of equity in primary health care access was therefore severely compromised.[5 6]

In an attempt to address these failures, some African countries – such as South Africa in 1994 and Uganda in 2001 – decided to eliminate user fees. Others, including Burundi, Liberia and Niger, followed suit. Concerned about the health Millennium Development Goals, many African countries now feel encouraged to provide free care at the point of service,[7 8] and more than 15 countries had implemented such policies by 2011. Several studies have been conducted on exemption policies. In the most

1  
2  
3 recent literature review, Ridde and colleagues identify 32 scientific articles on the  
4 experiences of seven African countries.[9] In addition, many evaluations have been  
5 conducted by non-governmental organizations or on behalf of African governments.  
6  
7 Although the recent proliferation of research comes in response to the urgency of the  
8 debate on user fees, it does not provide the necessary guidance for decision-makers as  
9 they try to adapt these policies to their objectives, target populations and local  
10 contexts.  
11  
12

### 13 **The challenges of evaluating complex social interventions**

14  
15 User fee exemption policies are inherently complex interventions.[10] They are  
16 dependent on the context in which they are implemented, and their implementation is  
17 not standardized.[11] They also have a strong social component, in that they are  
18 designed to promote and protect the health of populations and to reduce inequalities.  
19  
20 Evaluating complex social interventions raises further questions about scientific  
21 research methods. The experimental approach seems to have reached its limits in  
22 understanding these interventions. Because it seeks to control contextual variables and  
23 to ensure that "all else is equal," it does not capture the complex nature of  
24 interventions whose outcomes, by definition, depend on the context in which they are  
25 implemented.[12] By contrast, the constructivist approach perceives social  
26 interventions as a complex process of negotiations between different actors. Such a  
27 vision seldom recognizes the asymmetry of powers between actors in a society, and  
28 often denies the role of structures in human choices.[13] In addition, by refusing any  
29 principle of causality, this approach does not address the question of the outcomes of  
30 an intervention in relation with processes.[14] More and more authors now support a  
31 "contingent" approach, implying that the choice of methods should be guided by the  
32 research question.[12 15]  
33  
34  
35  
36  
37  
38  
39  
40  
41  
42  
43  
44  
45  
46  
47  
48  
49  
50  
51  
52  
53  
54  
55  
56  
57  
58  
59  
60

1  
2  
3 As an alternative to this methodological debate, Chen and Rossi suggest a theory-  
4 based perspective.[16] They believe that theorization allows a better understanding of  
5 how interventions, and social phenomena in general, are supposed to work. Such an  
6 approach, which focuses on "black boxes" of programs would capture the complexity  
7 of social interventions by studying how the different theoretical elements that  
8 compose them are intertwined [17 18] and by reintegrating the context as a key  
9 element in the production of outcomes. In addition, from an *Evidence-based Policy*  
10 (EBP) perspective, shedding light on the multiple logics that underlie policies would  
11 be more useful to decision-makers.  
12

13  
14 By extending the scope of *Evidence-based Medicine*, EBP meets the growing demand  
15 that political decisions be justified through lessons learned from past experiences. The  
16 theory-based approach would allow knowledge of the different contexts in which an  
17 intervention works to be broadened,[18 19] and the accurate level of abstraction with  
18 which to generalize the results of research to be achieved.[20] Thus, it would ensure  
19 the external validity of evaluation studies and make the results transferable to other  
20 contexts. By providing insights into how programs operate and can be implemented in  
21 different contexts, this type of evaluation would be better able to meet the  
22 expectations of decision-makers.[21]  
23

24  
25 Based on this approach, the realistic evaluation suggests that we set aside the  
26 traditional question of the effectiveness of interventions and instead investigate how  
27 they work.[13] The question is no longer: *Do interventions work?* But also: *How? For*  
28 *which populations? And in what contexts?*  
29

### 30 **Syntheses and systematic reviews: the tools of Evidence-based Policy**

31  
32 Two documents have been produced to inform technicians and decision-makers in  
33 charge of formulating and/or implementing exemption policies in their countries. In  
34  
35  
36  
37  
38  
39  
40  
41  
42  
43  
44  
45  
46  
47  
48  
49  
50  
51

1  
2  
3 2008, Save The Children UK (STC-UK) published a guide to help with the planning  
4 and implementation of exemption policies.[22] In 2009, UNICEF published a *Policy*  
5  
6  
7 *Guidance Note*,[23] based on evaluations of exemption policies conducted in several  
8  
9 African countries.[24] These documents have limitations, however. First, the  
10 document by STC-UK is only based on available data on the Ugandan experience,  
11  
12 which limits the scope of its arguments, especially since it specifically states that  
13 these data are not homogeneous. In addition, its recommendations are more common-  
14 sense than the result of a systematic analysis of the variables involved in the  
15 exemption processes. Finally, the recommended steps focus on macro-level planning  
16 and implementation, and leave out key elements for the success of policies of this  
17 scale, such as the mechanisms at work or the contextual elements that come into play.  
18  
19 The UNICEF document partially complements the STC–UK guide because its  
20 recommendations come from a more in-depth analysis, addressing the issue of context  
21 and process of policy formulation more precisely. However, it is a technical "toolbox"  
22 with a relatively normative perspective. While informing decision-makers on what  
23 elements to consider in formulating policies, it does not give them any indication on  
24 how these elements interact with the context.  
25  
26  
27  
28  
29  
30  
31  
32  
33  
34  
35  
36  
37  
38  
39  
40  
41  
42  
43  
44  
45  
46  
47  
48  
49  
50  
51  
52  
53  
54  
55  
56  
57  
58  
59  
60

Ridde and colleagues conducted two literature reviews on exemption policies, using the *scoping study* method. The first review gives an outline of the scientific knowledge on this issue and draws attention to research needs.[25] The authors attempt to make some recommendations; however, this method presents a risk of over-interpretation of data. It also has methodological limitations: on the one hand, the quality of the studies was not assessed, while on the other hand, by deciding to focus solely on scientific publications with peer review, the authors excluded a large amount of contextual and informal knowledge. The objective of the second literature

1  
2  
3 review is to highlight the pressures exerted by exemption policies on health  
4  
5 systems.[26] The criticisms to the first review also apply here. Additionally, this  
6  
7 second review is not intended to guide decision-makers by responding to their  
8  
9 expectations on the operation and implementation of policies. Therefore, these  
10  
11 documents are of limited interest for policy-makers and international organizations,  
12  
13 especially in a context where the idea of "evidence-based" policy predominates.  
14  
15 Meta-analysis and systematic reviews are the favorite tools of EBP supporters and  
16  
17 decision-makers, for the good reason that "[...] *good evidence syntheses free them up*  
18  
19 *to concentrate on the other aspects that go into policy-making [...]*".[27] A systematic  
20  
21 review was published in 2011 by Lagarde and Palmer evaluating the effectiveness of  
22  
23 different schemes of health-care funding.[28] Only randomized controlled trials,  
24  
25 interrupted time-series studies and controlled before-and-after studies were included,  
26  
27 in accordance with the EPOC (Effective Practice and Organization of Care Group of  
28  
29 the Cochrane Collaboration) method which the authors used to assess the quality of  
30  
31 research design. Based on these criteria, the researchers only included five studies, all  
32  
33 of which were deemed to be of low quality. They explain: "*We considered the*  
34  
35 *evidence on the removal of user fees to be at high risk of bias. In particular, the*  
36  
37 *presence of confounding factors (concurrent policy changes), the lack of reliability of*  
38  
39 *routine data and limited sample sizes weaken the evidence base*".[28] This systematic  
40  
41 review reveals the limitations of the traditional way of synthesizing scientific  
42  
43 knowledge when it comes to complex social interventions. Considering only  
44  
45 knowledge produced through methods limiting bias and random errors,[29] studies  
46  
47 using so-called less robust designs, including research designs used in social sciences,  
48  
49 were excluded even though they provide valuable scientific data.[30] By focusing on  
50  
51 the effectiveness of interventions, such systematic reviews do not take into account  
52  
53  
54  
55  
56  
57  
58  
59  
60

1  
2  
3 the process and contextual elements, which allowed the interventions to produce  
4  
5 outcomes.

6  
7 The need to deal with complex social interventions has led to changes in these  
8  
9 synthesis tools.[31 32] Systematic reviews in fact failed to keep their promises in  
10  
11 terms of transferability to other more social issues.[33] New forms of reviews which  
12  
13 take into account not only qualitative data,[34] but also the combination of  
14  
15 quantitative and qualitative data, are emerging.[35] As noted by Jackson and  
16  
17 colleagues, it is no longer the hierarchy of evidence that must guide the selection of  
18  
19 studies to be included in the review, but their usefulness in answering the research  
20  
21 question.[36] As such, mixed approaches seem promising. Pope and colleagues  
22  
23 identify four mixed review approaches: the narrative approach, the thematic approach,  
24  
25 the EPPI (Evidence for Policy and Practice Information) approach, and the realistic  
26  
27 approach.[37] According to Pluye and colleagues, only the last two involve a  
28  
29 systematic review process.[38] The EPPI approach juxtaposes several reviews to  
30  
31 answer different sub-questions, which together make up a very broad main research  
32  
33 question. The final step of this type of review is to combine the results of the "sub-  
34  
35 reviews" in a meta-synthesis.[33] This process requires a significant amount of time  
36  
37 to complete and the availability of several researchers.[37] Moreover, it is said to  
38  
39 yield limited results in terms of the meta-synthesis. Proposed by Pawson in line with  
40  
41 the realistic evaluation,[13] the realist review aims to develop middle-range theories  
42  
43 that take into account how the context (C) influences mechanisms (M) to produce  
44  
45 outcomes (O).[39 40] That is what Pawson calls C-M-O configurations. It is the only  
46  
47 review that proposes a systematic integration of contextual analysis in order to better  
48  
49 understand how interventions produce outcomes.  
50  
51  
52  
53  
54  
55  
56  
57  
58  
59  
60

## METHODS

### The realist approach

The realist approach provides the possibility of identifying causal patterns underlying complex interventions.[13] Realism assumes that reality exists independently of human constructions, but that it is only perceptible through our senses.[14] This approach postulates the existence of causal patterns, regardless of our understanding. Thus, an intervention does not work in itself; it is the mechanisms that underlie it which act (or fail to act) to produce the observed outcomes. These mechanisms are influenced by the context in which the intervention is implemented. From this perspective, the replication of experiments that try to control contextual elements is futile. We should instead try to observe patterns in the production of outcomes – what Lawson calls "*demi-reg*" (quoted by Pawson, p. 22)[39] – and identify causal arrangements. This is called the "generative" vision of causality. Research aims therefore to identify and describe, in a certain context (C), the mechanisms (M) operated by the intervention to produce its outcomes (O).

The approach proposed by Pawson and Tilley is rooted in a realist perspective of social change.[13] Social phenomena are constructed both by the actions of individuals and their understanding of such phenomena – individuals who in turn are constrained and enabled by social structures. As social systems, social interventions are built from the interplay between agents and structure. We must therefore understand how the agent and the structure interact to produce what characterizes social reality. The manner in which interventions are broken down into context, mechanisms and outcomes should enhance our understanding of these social phenomena. Mechanisms should be understood as elements from the reasoning of actors facing interventions.[10] Realism in social sciences holds that demi-regs are formed from the occurrence of mechanisms: "*Realists thus think of the underlying*



1  
2  
3 *engine of social reality in terms of people's reasoning as well as the resources*  
4  
5 *available to them".[41] The context is similar to, but not limited to, the structure: it is*  
6  
7 social, cultural, historical or institutional. It is what allows or, conversely, what  
8  
9 constrains the action of agents. Indeed, actions are part of a set of social processes that  
10  
11 constitutes social reality. Outcomes are the product of the interaction of these  
12  
13 mechanisms and the context. Since outcomes are dependent on the context, they are  
14  
15 therefore not immutable laws of nature.  
16  
17 CMO configurations are the tools that help explain social change by identifying these  
18  
19 demi-regs (Table 1).[14] The goal is to refine these demi-regs by submitting them to  
20  
21 empirical testing. More precisely, the identification of demi-regs must, according to  
22  
23 Pawson, allow the development of middle-range theories, defined by Merton as  
24  
25 *"theories that lie between the minor but necessary working hypotheses that evolve in*  
26  
27 *abundance during day-to-day research and the all-inclusive systematic efforts to*  
28  
29 *develop a unified theory that will explain all the observed uniformities of social*  
30  
31 *behavior, social organization and social change".[42] Middle-range theories enable*  
32  
33 us to get to the level of abstraction needed to understand the diversity of outcomes  
34  
35 produced in different contexts.[41] The CMO framework ensures the external validity  
36  
37 of the research because it lets us move to the necessary level of abstraction for the  
38  
39 theory or theories to be useful in other contexts. Blaise and colleagues thus speak of  
40  
41 the "plausibility" of the predictive power of these theories.[12] They explain that  
42  
43 middle-range theories, rather than interventions per se, are what one should try to  
44  
45 replicate in other contexts by improving the design of interventions based on similar  
46  
47 mechanisms.  
48  
49  
50  
51  
52  
53  
54  
55  
56  
57  
58  
59  
60

**Table 1 - Key concepts of the realist approach, adapted from Ridde and colleagues[10]**

|                            |                                                                                                                                                                   |
|----------------------------|-------------------------------------------------------------------------------------------------------------------------------------------------------------------|
| <b>Mechanism</b>           | Element of the reasoning of the actor facing an intervention. A mechanism: 1) is generally hidden; 2) is sensitive to context variations; 3) produces outcomes.   |
| <b>CMO configuration</b>   | Conceptual tool to link the elements of context, mechanisms and outcomes of an intervention.                                                                      |
| <b>Intervention theory</b> | Set of hypotheses that explain how and why the intervention is expected to produce outcomes. It can be broken down in the form of one or more CMO configurations. |
| <b>Middle-range theory</b> | Level of theoretical abstraction that provides an explanation of semi-regularities in the context-mechanism-outcome interactions of a set of interventions.       |

The demi-regs are explained through expanding the conceptual vision, that is moving from a descriptive structure to an explanatory one: "[...] *theory-building moves up and down a ladder of abstraction*".[41] By observing the mechanisms underlying user fee exemption policies in different contexts, it should be possible to see the appearance of demi-regs in the outcomes. The demi-regs can then be synthesized in a typology of "context - mechanism - outcomes" (CMO) families.[18]

### **Research questions**

The following research question, broken down into three specific questions, guides the research: what are the outcomes of user fee exemption policies implemented in Africa, why do they produce such outcomes, and what contextual elements come into play?

### **Study design**

1  
2  
3 A systematic realist review such as that proposed by Pawson and colleagues will be  
4 carried out.[39 40] This will make it possible to integrate knowledge on the  
5 experiences of at least 15 African countries. The study will be conducted in five steps.  
6  
7 The process adopted for this research will not be linear but iterative, based on the  
8 course of action proposed by Pawson.[39]  
9

10  
11  
12  
13  
14 *Step 1: Identifying mechanisms operated by exemption policies.* This step, which is  
15 similar to a logic analysis,[43] has two specific objectives: 1) to highlight the theory  
16 of exemption policies, i.e. how they are supposed to work, for which recipients and  
17 with what anticipated outcomes; and 2) to identify the contextual elements  
18 (institutional, organizational, socio-economic, cultural) that influence the way  
19 mechanisms activated by exemption policies are expected to operate and produce  
20 outcomes. It is therefore a matter of identifying the mechanisms that form the basis of  
21 exemption policies. We will first reconstruct the logic of the issue that these policies  
22 aim to solve (namely the financial barrier to health-care access), and second,  
23 reconstruct the intervention theory of these policies. This will be done in an  
24 exploratory, non-exhaustive and inductive way. Two sources of information will be  
25 sought: 1) official and scientific documentation around the main concepts of  
26 exemption policies, including the determinants of health-care access and equity, and  
27 2) key actors' experiences. These actors (decision-makers and health managers from  
28 Mali, Burkina Faso and Niger) will participate in developing these models. Then, a  
29 framework will be formulated based on the context-mechanism-outcome principle.  
30 This framework will be discussed and validated with local and international  
31 exemption policy experts.  
32  
33  
34  
35  
36  
37  
38  
39  
40  
41  
42  
43  
44  
45  
46  
47  
48  
49  
50  
51  
52

53  
54 *Step 2: Researching primary data.* With regard to the scientific data, the following  
55 document search strategy will be used: 1) the Ovid Medline, Embase, Popline, HMIC,  
56  
57  
58  
59  
60

1  
2  
3 Web of Knowledge, African Healthline, AJOL (African Journals On Line), EconLit,  
4  
5 Business Source Premier databases will be used, as well as the websites of journals  
6  
7 that regularly publish articles on health system financing, such as Health Policy and  
8  
9 Planning, WHO Bulletin, and Social Science and Medicine; 2) combinations of key  
10  
11 words in English and French (Table 2) and their truncations will be entered in these  
12  
13 databases; 3) the relevance of the retrieved documents will be assessed according to  
14  
15 exclusion and inclusion criteria (Table 3); 4) bibliographic references from the  
16  
17 included documents will be reviewed using the "snowballing" technique to identify  
18  
19 additional documents; 5) the ISI Web of Science database will be used to identify  
20  
21 articles citing the included documents. Articles that address the context, mechanisms  
22  
23 or outcomes may be included.  
24  
25  
26  
27  
28

29 **Table 2 - List of key words for the document search strategy**

| AND       |            |            | -OR-        | Themes and expressions |              |
|-----------|------------|------------|-------------|------------------------|--------------|
| -OR-      | -OR-       | -OR-       |             | (gray literature)      |              |
| User fee* | Aboli*     | Developing | Free        | Health                 | Health care  |
| User      | Exempt*    | countr*    | healthcare  | services               | costs        |
| charge*   | Waiv*      | Africa*    | Free care   | accessibility          | Health       |
| Cost-     | Remov*     | Low income | Free        | Health                 | insurance    |
| sharing   | End*       | countr*    | service*    | facilities             | Health       |
| Cost-     | Discontin* | Middle     | Free health | Health                 | expenditure* |
| recovery  | Free       | income     | care        | disparities            | Health       |
| Out-of-   |            | countr*    | Universal   | Health                 | financing    |
| pocket    |            | LMIC*      | access to   | policy                 | National     |
|           |            |            | healthcare  | Health                 | health       |
|           |            |            | Universal   | equity                 | programs     |

|  |  |  |                          |  |  |
|--|--|--|--------------------------|--|--|
|  |  |  | access to<br>health care |  |  |
|--|--|--|--------------------------|--|--|

Because gray literature is a relevant source of information for realist reviews, evaluation reports or policy documents published by African governments, international organizations, non-governmental organizations and consultancy firms, as well as dissertations and theses, may also be included. Our contacts with networks of researchers, decision-makers and other stakeholders in North America, Europe and Africa will facilitate the collection of these documents. The Database on African Theses and Dissertations (DATAD) and Dissertations and Thesis will also be searched.

The search for new documents will end at the point of saturation, i.e. when the research yields no more new sources of information. References will be compiled in Mendeley, a reference manager.

### Table 3 - Inclusion and exclusion criteria

|                                                                                                                                                                                                                                                                                                                                                                                                                                                                         |
|-------------------------------------------------------------------------------------------------------------------------------------------------------------------------------------------------------------------------------------------------------------------------------------------------------------------------------------------------------------------------------------------------------------------------------------------------------------------------|
| <p><b>Inclusion criteria:</b></p> <ul style="list-style-type: none"> <li>• The document's main focus is health.</li> <li>• The document deals with at least one African country.</li> <li>• The document addresses the issue of user fee exemption in the health sector<br/>OR the research takes place in the context of user fee exemption in the health sector.</li> <li>• The user fee exemption policy dealt with in the document is a national policy.</li> </ul> |
| <p><b>Exclusion criteria:</b></p> <ul style="list-style-type: none"> <li>• The document's main theme is not health.</li> </ul>                                                                                                                                                                                                                                                                                                                                          |

- The document does not deal with at least one African country.
- The document addresses a different issue than the issue of user fee exemption in the health sector.
- The document focuses on user fee exemption in the context of cost recovery policies (waivers).
- The document focuses on user fee exemption as part of a program run by a non-governmental organization.

*Step 3: Assessing the quality of studies.* Unlike traditional systematic reviews, there is no need to assess study designs based on the hierarchy of evidence in a realist review. Quality assessment is done instead in a heuristic perspective to enrich the CMO configurations and should answer the question: "*Is this study good enough to provide some evidence that will contribute to the synthesis?*"[39] Each study should be assessed according to how it clarifies the configurations. Therefore, the unit of analysis is not the study itself, but fragments of information that are produced.[44] However, this approach does not ensure a transparent selection of articles. Some authors have assessed the methodological quality of the articles in their realist review, but failed to specify which tools they used.[45 46] The Mixed Method Appraisal Tool (MMAT) proposed by Pluye and colleagues[47] seems an appropriate compromise between the need for a rigorous and transparent quality assessment and the need to consider the data according to their relevance for the development of middle-range theories. Indeed, this tool makes it possible to describe the methodology of qualitative, quantitative and mixed studies based on 19 separate items. For this review, studies considered to be of too low quality may be excluded (the minimum quality standard will be determined considering the overall quality of the studies). To

1  
2  
3 facilitate this process, a summary table will specify the authors, objectives, type of  
4  
5 study, different methodological aspects, conclusions and assessment made according  
6  
7 to the MMAT.  
8

9  
10 *Step 4: Extracting the data.* The documents included in the review will be compiled  
11  
12 into the QDA Miner<sup>®</sup> software to facilitate their organization and analysis. This  
13  
14 software can encode and annotate a large number of documents, extract relevant data  
15  
16 and link emerging themes. The analytical framework developed in step 1 will be used  
17  
18 to analyze the documents and will be further specified in an iterative manner so as to  
19  
20 integrate new explanatory elements. More specifically, data from which new  
21  
22 categories are created and differences between categories will be reported.  
23

24  
25 *Step 5: Synthesizing the data.* Each primary study will be "*inspected for evidence,*  
26  
27 *according to how it supports, weakens, modifies, supplements, reinterprets or*  
28  
29 *refocuses the preliminary theory*".[39] By applying, completing and clarifying the  
30  
31 analytical framework, we can take a critical look at the contribution of each study to  
32  
33 the initial theory. It will thus be possible to specify configuration elements (CMO)  
34  
35 and develop a middle-range theory. This process will follow the abductive approach  
36  
37 that Blom and Morén, citing Danermark, explain: "*Abduction means that single events*  
38  
39 *or occurrences – by means of concepts, theory and models – are described and*  
40  
41 *interpreted as expression of more general phenomena*".[48] Each study will help  
42  
43 clarify or reformulate the CMO configurations in order to take into account potential  
44  
45 contradictory elements. The middle-range theory will finally be put into words, as  
46  
47 well as modeled to highlight the links between contextual elements, mechanisms and  
48  
49 outcomes.  
50  
51  
52

#### 53 54 **Internal and external validity**

1  
2  
3 The internal validity of the research is ensured by the in-depth study of the theoretical  
4 articulation of user fee exemption policies. The construction of explanations so as to  
5 make "sense" of exemption policies, through an iterative process between empirical  
6 data and construction of CMO configurations, also contributes to strengthening  
7 internal validity. The external validity of the research stems from the principle of  
8 explanation discussed above, as well as the approach based on the CMO  
9 configurations.[49] Taking the context into account in the production of outcomes  
10 increases the generalization potential of the study. Indeed, developing middle-range  
11 theories allows a better understanding of the elements involved in the production of  
12 outcomes. A research logbook will document the research approach step by step,  
13 along with any adjustments and methodological choices made. This logbook will  
14 contain methodological as well as theoretical notes. This will help ensure the  
15 reliability of the research results.[50] A glossary will be prepared to clarify the  
16 terminology used in the research.  
17  
18  
19  
20  
21  
22  
23  
24  
25  
26  
27  
28  
29  
30  
31  
32  
33  
34

## 35 **DISCUSSION**

### 36 **Importance of the research**

37  
38 The results of the proposed research may be useful to African decision-makers who  
39 would be willing to implement exemption policies in their countries and to  
40 government and international agencies that wish to support them. More than 30  
41 countries have adopted the BI and are thus potential users of the results of this  
42 research, especially in the context of an emerging consensus around these issues  
43 within the international community.[8 51] In addition, this study is part of a broader  
44 research movement initiated around new practices of user fee exemptions in LMICs,  
45 but which mainly focuses on outcomes at the expense of other pieces of knowledge  
46  
47  
48  
49  
50  
51  
52  
53  
54  
55  
56  
57  
58  
59  
60



1  
2  
3 that will be studied within this research. Once the review has been completed, a  
4  
5 realistic evaluation could be undertaken to test the new middle-range theory.  
6

7  
8 Few researchers, including those in the field of public health, have used the realist  
9  
10 approach to synthesize the literature. This is doubtless due to both methodological and  
11  
12 conceptual challenges.[10] A secondary objective is therefore to pursue the reflections  
13  
14 initiated on the realist review in order to facilitate its use for the benefit of research on  
15  
16 health policies.[52]  
17

### 18 **Knowledge-sharing strategy**

19  
20 To promote the use of the knowledge generated through this research, three activities  
21  
22 will be implemented. First, a restitution workshop will be organized at the end of the  
23  
24 research with key stakeholders. Then, the RESAO,[53] a West African network of  
25  
26 researchers and decision-makers, will be involved in the research. Its role will be to  
27  
28 mobilize key informants at step 1 and for the restitution workshop, and also to provide  
29  
30 technical expertise on exemption policies. Finally, a policy brief in French and in  
31  
32 English presenting the research results will be produced and broadcast via the RESAO  
33  
34 and the Financial Access to Health Services Community of Practice.[54]  
35  
36  
37

### 38 **Ethical considerations**

39  
40 The study has been approved by the Ethics Committee of the CHUM Research  
41  
42 Centre. It received funding from the Canadian Institutes of Health Research.  
43  
44  
45  
46  
47  
48  
49  
50  
51  
52  
53  
54  
55  
56  
57  
58  
59  
60

## ACKNOWLEDGEMENTS

ER is a Ph.D. candidate in public health at Montreal University (Canada), and a fellow of the Strategic Training Program in Global Health Research, a partnership of the Canadian Institutes of Health Research and the Québec Population Health Research Network. VR is a New Investigator of the Canadian Institutes for Health Research.

## COMPETING INTERESTS

None.

## FUNDING

The project is funded by the Canadian Institutes for Health Research under the financing opportunity « Knowledge synthesis ».

## Reference list

- 1 Knippenberg R, Alihonou E, Soucat A, et al. Implementation of the Bamako Initiative: Strategies in Benin and Guinea. *Int J Health Plann Manage* 1997;12(S1):S29-S47 doi:10.1002/(SICI)1099-1751(199706)12:1+<S29::AID-HPM465>3.0.CO;2-U
- 2 Gilson L, Mills A. Health sector reforms in sub-Saharan Africa: lessons of the last 10 years. *Health Policy* 1995;32(1-3):215-43
- 3 James C, Hanson K, McPake B, et al. To Retain or Remove User Fees? Reflections on the current debate. *Appl Health Econ Health Policy* 2006;5(3):137-53
- 4 Laterveer L, Munga M, Shwerzel P. Equity implications of health sector user fees in Tanzania. Do we retain the user fee or do we set the future user f(r)ee? Leusden: ETC Crystal for REPOA / Partners in International Health, 2004:36.
- 5 Gilson L. The lessons of user fee experience in Africa. *Health Policy Plan* 1997;12(4):273-85
- 6 Ridde V, Girard JE. Douze ans après l'initiative de Bamako : constats et implications politiques pour l'équité d'accès aux services de santé des indigents africains. *Santé Publique* 2004;1(41):37-51  
doi:10.3917/spub.041.0037
- 7 Sambo LG, Kirigia JM, Ki-Zerbo G. Perceptions and viewpoints on proceedings of the Fifteenth Assembly of Heads of State and Government of the African Union Debate on Maternal, Newborn and Child Health and

- 1  
2  
3 Development, 25–27 July 2010, Kampala, Uganda. *BMC Proc* 2011;5(Suppl  
4  
5 5)(S1). <http://www.biomedcentral.com/1753-6561/5/S5/S1> (accessed 29  
6  
7 November 2011). doi:10.1186/1753-6561-5-S5-S1  
8  
9  
10 8 Commission for Africa. Still our common interest: Commission for Africa  
11  
12 Report 2010. In: Commission for Africa, editor. *Commission for Africa*.  
13  
14 London: Commission for Africa, 2010:68.  
15  
16 9 Ridde V, Robert E, Meessen B. Les pressions exercées par l'abolition du  
17  
18 paiement des soins sur les systèmes de santé. In: Health systems financing,  
19  
20 editor. *World Health Report (2010) Background Paper, 18*. Geneva:  
21  
22 World Health Organization, 2010:p.43.  
23  
24  
25 10 Ridde V, Robert E, Guichard A, et al. L'approche Realist à l'épreuve du  
26  
27 réel : de quelques défis méthodologiques. *Canadian Journal of Program*  
28  
29 *Evaluation* 2012;26(3)  
30  
31  
32 11 Egan M, Bambra C, Petticrew M, et al. Reviewing evidence on complex  
33  
34 social interventions: appraising implementation in systematic reviews of  
35  
36 the health effects of organisational-level workplace interventions. *J*  
37  
38 *Epidemiol Community Health* 2009;63(1):4-11  
39  
40 doi:10.1136/jech.2007.071233 [published Online First: 21 August 2008  
41  
42  
43 12 Blaise P, Marchal B, Lefèvre P, et al. Au-delà des méthodes  
44  
45 expérimentales, l'approche réaliste en évaluation. In: Potvin L, Moquet M-  
46  
47 J, Jones CM, eds. *Guide d'aide à l'action : inégalités sociales de santé*.  
48  
49 Saint-Denis: Institut national de prévention et d'éducation pour la santé  
50  
51 2010:285-96.  
52  
53  
54 13 Pawson R, Tilley N. *Realistic Evaluation*. London: Sage Publications 1997.  
55  
56  
57  
58  
59  
60

- 1  
2  
3 14 Julnes G, Mark MM. Evaluation as Sensemaking: Knowledge Construction  
4  
5 in a Realist World. In: Henry GT, Julnes G, Mark MM, eds. *Realist*  
6  
7 *Evaluation: An Emerging Theory in Support of Practice*. San Francisco:  
8  
9 New Directions for Evaluation (no.78) 1998:33-52.  
10  
11  
12 15 Chen HT. The Roots of Theory-Driven Evaluation. Current Views and  
13  
14 Origins. In: Alkin MC, ed. *Evaluation roots. Tracing Theorists' Views and*  
15  
16 *Influences*. London: Sage Publications 2004:132-52.  
17  
18  
19 16 Chen H-T, Rossi PH. The Multi-Goal, Theory-Driven Approach to  
20  
21 Evaluation: A Model Linking Basic and Applied Social Science. *Social*  
22  
23 *Forces* 1980;59(1):106-22  
24  
25  
26 17 Stame N. Theory-Based Evaluation and Types of Complexity. *Evaluation*  
27  
28 2004;10(1):58-76 doi:10.1177/1356389004043135  
29  
30  
31 18 Pawson R. Nothing as practical as Good Theory. *Evaluation*  
32  
33 2003;9(4):471-90 doi:10.1177/1356389003094007  
34  
35  
36 19 Pawson R, Sridharan S. Theory-driven evaluation of public health  
37  
38 programs. In: Killoran A, Mike K, eds. *Evidence-based Public Health:*  
39  
40 *Effectiveness and efficiency*. New York: Oxford University Press 2010:43-  
41  
42 62.  
43  
44 20 Chen H-T. Generalization Evaluation. In: Chen H-T, ed. *Theory-driven*  
45  
46 *Evaluation*. Newbury Park: Sage Publications 1990:219-54.  
47  
48  
49 21 Chen H-T. Theory-driven Evaluations: Need, Difficulties, and Options.  
50  
51 *American Journal of Evaluation* 1994;15(1):79-82  
52  
53 doi:10.1177/109821409401500109  
54  
55  
56 22 McPake B, Schmidt A, Araujo E, et al. Freeing up Healthcare. A guide to  
57  
58 removing user fees. London: Save The Children UK, 2008:44.  
59  
60

- 1  
2  
3 23 Meessen B. Removing User Fees in the Health Sector in Low-Income  
4  
5 Countries: A Policy Guidance Note for Programme Managers. In:  
6  
7 UNICEF, editor. *Health Section Working Paper*. New York: UNICEF,  
8  
9 2009:38.  
10  
11  
12 24 Meessen B, Hercot D, Noirhomme M, et al. Removing user fees in the  
13  
14 health sector: a review of policy processes in six sub-Saharan African  
15  
16 countries. *Health Policy Plan* 2011;26(Suppl 2):ii16-ii29  
17  
18 doi:10.1093/heapol/czr062  
19  
20  
21 25 Ridde V, Morestin F. A scoping review of the literature on the abolition of  
22  
23 user fees in healthcare services in Africa. *Health Policy Plan*  
24  
25 2011;26(1):1-11 doi:10.1093/heapol/czq021 [published Online First: 14  
26  
27 June 2010  
28  
29  
30 26 Ridde V, Robert E, Meessen B. Les pressions exercées par l'abolition du  
31  
32 paiement des soins sur les systèmes de santé. In: WHO Department of  
33  
34 Health System Financing, editor. *Background Paper for the World Health*  
35  
36 *Report 2010*,. Geneva: WHO, 2010:p.43.  
37  
38  
39 27 Sheldon T. Making evidence synthesis more useful for management and  
40  
41 policy-making. *J Health Serv Res Policy* 2005;10(S1):1-5  
42  
43 doi:10.1258/1355819054308521  
44  
45  
46 28 Lagarde M, Palmer N. The impact of user fees on access to health services  
47  
48 in low- and middle-income countries. *Cochrane Database Syst Rev* 2011  
49  
50 Apr 13(4). <http://dx.doi.org/10.1002/14651858.CD009094> (accessed 29  
51  
52 November 2011). doi:10.1002/14651858.CD009094  
53  
54  
55  
56  
57  
58  
59  
60

- 1  
2  
3 29 Cook DJ, Mulrow CD, Haynes RB. Systematic Reviews: Synthesis of Best  
4 Evidence for Clinical Decisions. *Ann Intern Med* 1997;126(5):376-80  
5  
6 doi:10.1059/0003-4819-126-5-199703010-00006  
7  
8  
9  
10 30 Gilson L, Hanson K, Sheikh K, et al. Building the Field of Health Policy  
11 and Systems Research: Social Science Matters. *PLoS Med*  
12 2011;8(8):e1001079 doi:10.1371/journal.pmed.1001079 [published Online  
13 First: 23 August 2011  
14  
15  
16  
17  
18 31 Shepperd S, Lewin S, Straus S, et al. Can We Systematically Review  
19 Studies That Evaluate Complex Interventions? *PLoS Med* 2009 Aug  
20 11;6(8). <http://dx.plos.org/10.1371/journal.pmed.1000086> (accessed 29  
21 November 2011). doi:10.1371/journal.pmed.1000086  
22  
23  
24  
25  
26  
27 32 Petticrew M. Systematic reviews in public health: old chestnuts and new  
28 challenges. *Bull World Health Organ* 2009;87(3):163-63A  
29  
30  
31  
32  
33  
34 33 White DG. Evaluating evidence and making judgements of study quality:  
35 loss of evidence and risks to policy and practice decisions. *Critical Public*  
36  
37  
38  
39  
40  
41 34 Barnett-Page E, Thomas J. Methods for the synthesis of qualitative  
42 research: a critical review. *BMC Med Res Methodol* 2009 August 11;9(59).  
43  
44  
45  
46  
47  
48  
49  
50 35 Dixon-Woods M, Agarwal S, Jones D, et al. Synthesising qualitative and  
51 quantitative evidence: a review of possible methods. *J Health Serv Res*  
52  
53  
54  
55  
56  
57  
58  
59  
60

- 1  
2  
3 36 Jackson N, Waters E, Guidelines for Systematic Reviews of Health  
4  
5 Promotion and Public Health Interventions Taskforce. The challenges of  
6  
7 systematically reviewing public health interventions. *J Public Health (Oxf)*  
8  
9 2004;26(3):303-07 doi:10.1093/pubmed/fdh164  
10  
11  
12 37 Pope C, Mays N, Popay J. *Synthesizing Qualitative and Quantitative*  
13  
14 *Health Evidence: A guide to methods*. Maidenhead: McGraw-Hill  
15  
16 Education 2007.  
17  
18  
19 38 Pluye P, Gagnon MP, Griffiths F, et al. A scoring system for appraising  
20  
21 mixed methods research, and concomitantly appraising qualitative,  
22  
23 quantitative and mixed methods primary studies in Mixed Studies  
24  
25 Reviews. *Int J Nurs Stud* 2009;46(4):529-46 doi:S0020-7489(09)00014-5  
26  
27 [pii]10.1016/j.ijnurstu.2009.01.009 [published Online First: 23 February  
28  
29 2009  
30  
31  
32 39 Pawson R. *Evidence-based Policy. A Realist Perspective*. London: Sage  
33  
34 Publications 2006.  
35  
36  
37 40 Pawson R, Greenhalgh T, Harvey G, et al. Realist review – a new method  
38  
39 of systematic review designed for complex policy interventions. *J Health*  
40  
41 *Serv Res Policy* 2005;10(S1):21-34 doi:10.1258/1355819054308530  
42  
43  
44 41 Pawson R. Middle-range realism. *European Journal of Sociology*  
45  
46 2000;41(2):283-325 doi:10.1017/S0003975600007050  
47  
48  
49 42 Merton RK. On sociological theories of the middle range. In: Merton RK,  
50  
51 ed. *Social theory and social structure*. New York: Free Press 1968:39-72.  
52  
53  
54 43 Rossi PH, Lipsey MW, Freeman HE. Expressing and Assessing Program  
55  
56 Theory. In: Rossi PH, ed. *Evaluation: A Systematic Approach*. Thousand  
57  
58 Oaks: Sage 2004:133-52.  
59  
60



- 1  
2  
3 44 Pawson R. Digging for nuggets: how 'bad' research can yield 'good'  
4  
5 evidence. *Realist Synthesis: Supplementary reading 6*, 2006:15.  
6  
7 45 Clamp S, Keen J. Electronic health records: Is the evidence base any use?  
8  
9 *Med Inform Internet Med* 2007 Mar;32(1).  
10  
11 <http://www.ingentaconnect.com/content/apl/tmif/2007/00000032/00000001/art00002>  
12  
13 [1/art00002](http://www.ingentaconnect.com/content/apl/tmif/2007/00000032/00000001/art00002) (accessed 28 November 2011).  
14  
15 doi:10.1080/14639230601097903  
16  
17 46 Dieleman M, Gerretsen B, van der Wilt GJ. Human resource management  
18  
19 interventions to improve health workers' performance in low and middle  
20  
21 income countries: a realist review. *Health Res Policy Syst* 2009 Apr  
22  
23 17;7(7). <http://www.health-policy-systems.com/content/7/1/7> (accessed 29  
24  
25 November 2011). doi:10.1186/1478-4505-7-7  
26  
27  
28 47 Pluye P, Robert E, Cargo M, et al. Proposal: A mixed methods appraisal  
29  
30 tool for systematic mixed studies reviews. Montréal: McGill University,  
31  
32 2011.  
33  
34 48 Blom B, Morén S. Analysis of generative mechanisms. *Journal of Critical*  
35  
36 *Realism* 2011;10(1):60-79  
37  
38 49 Chen H-T, Rossi PH. The theory-driven approach to validity. *Evaluation*  
39  
40 *and Program Planning* 1987;10(1):95-103 doi:10.1016/0149-  
41  
42 7189(87)90025-5  
43  
44  
45 50 Devers KJ. How will we know "good" qualitative research when we see it?  
46  
47 Beginning the dialogue in health services research. *Health Serv Res*  
48  
49 1999;34(5):1153-88  
50  
51  
52  
53  
54  
55  
56  
57  
58  
59  
60

- 1  
2  
3 51 Yates R. Universal health care and the removal of user fees. *Lancet*  
4  
5 2009;373(9680):2078-81 doi:10.1016/S0140-6736(09)60258-0 [published  
6  
7 Online First: 9 April 2009  
8  
9  
10 52 Greenhalgh T, Wong G, Westhorp G, et al. Protocol - realist and meta-  
11  
12 narrative evidence synthesis: Evolving Standards (RAMESES). *BMC Med*  
13  
14 *Res Methodol* 2011 Aug 16;11(115). [http://www.biomedcentral.com/1471-](http://www.biomedcentral.com/1471-2288/11/115)  
15  
16 [2288/11/115](http://www.biomedcentral.com/1471-2288/11/115) (accessed 29 November 2011). doi:10.1186/1471-2288-11-  
17  
18 115  
19  
20 53 RESAO. Bienvenue sur le site de RESAO. In: RESAO, editor. RESAO ed:  
21  
22 RESAO, 2011.  
23  
24  
25 54 FACOP. About FACOP, 2011.  
26  
27  
28  
29  
30  
31  
32  
33  
34  
35  
36  
37  
38  
39  
40  
41  
42  
43  
44  
45  
46  
47  
48  
49  
50  
51  
52  
53  
54  
55  
56  
57  
58  
59  
60

# Protocol: A realist review of user fee exemption policies for health services in Africa

Emilie Robert<sup>1§</sup>, Valéry Ridde<sup>1,2</sup>, Bruno Marchal<sup>3§</sup>, Pierre Fournier<sup>1,2</sup>

<sup>1</sup>Centre de recherche du Centre hospitalier de l'Université de Montréal (CR-CHUM), Faculté de médecine, Université de Montréal, Pavillon Masson, 3850, rue Saint-Urbain, Montréal (Québec) H2W 1T7C, CANADA. Phone: +1.514.393.6111 (#1455)

<sup>2</sup>Département de médecine sociale et préventive, Université de Montréal, Québec, Canada

<sup>3</sup>Department of public health, Institute of Tropical Medicine, Antwerp, Belgium

§Corresponding author

Email addresses:

ER: [emilie.robert.3@umontreal.ca](mailto:emilie.robert.3@umontreal.ca)

VR: [valery.ridde@umontreal.ca](mailto:valery.ridde@umontreal.ca)

BM: [BMarchal@itg.be](mailto:BMarchal@itg.be)

PF: [pierre.fournier@umontreal.ca](mailto:pierre.fournier@umontreal.ca)

## KEYWORDS

Realist review; user fee; free care; health policy; Africa

## WORD COUNT

4,236 words

## ABSTRACT

### Background

Four years prior to the MDGs deadline, low and middle-income countries and international stakeholders are looking for evidence-based policies to improve access to healthcare for the most vulnerable populations. User fee exemption policies are one of the potential solutions. However the evidence is disparate and systematic reviews have failed to provide valuable lessons. This study we propose to conduct aims to produce an innovative synthesis of the available evidence on user fee exemption policies in Africa.

### Methods

We will carry out a realist review to answer the following research question: what are the outcomes of user fee exemption policies implemented in Africa, why do they produce such outcomes, and what contextual elements come into play? This type of review aims to understand how contextual elements influence the production of outcomes through the activation of specific mechanisms, in the form of Context-Mechanism-Outcome configurations. The review will be conducted in five steps: 1) identifying with key stakeholders the mechanisms underlying user fee exemption policies to develop the analytical framework; 2) searching for and selecting primary data; 3) assessing the quality of evidence using the Mixed Method Appraisal Tool; 4) extracting the data using the analytical framework; and 5) synthesizing the data in the form of Context-Mechanism-Outcomes configurations. The output will be a middle-range theory specifying how user fee exemption policies work, for what populations, and under what circumstances.

### Ethics and dissemination

The two main target audiences are: researchers who are looking for examples to implement a realist review, and policy-makers and international stakeholders looking

1  
2  
3 for lessons learnt on user fee exemption. For the latter, a knowledge-sharing strategy  
4 involving local scientific and policy networks will be implemented. The study has  
5 been approved by the Ethics Committee of the CHUM Research Centre. It received  
6  
7 funding from the Canadian Institutes of Health Research. The funders will not have  
8  
9 any role in study design; collection, management, analysis, and interpretation of data;  
10  
11 writing of the report; and the decision to submit the report for publication, including  
12  
13 who will have ultimate authority over each of these activities.  
14  
15  
16  
17  
18  
19  
20  
21  
22  
23  
24  
25  
26  
27  
28  
29  
30  
31  
32  
33  
34  
35  
36  
37  
38  
39  
40  
41  
42  
43  
44  
45  
46  
47  
48  
49  
50  
51  
52  
53  
54  
55  
56  
57  
58  
59  
60

## BACKGROUND

### User fee exemption in African countries

Several low- and middle-income countries (LMICs), specifically countries in Africa, have removed user fees for health services in order to improve accessibility to health care for vulnerable populations. This move follows the setback of the Bamako Initiative (BI), which was launched in 1987. Initiated in the spirit of the Alma Ata Declaration, the BI – promoted by the United Nations Children’s Fund (UNICEF) and the World Health Organization (WHO) – aimed to improve access to primary health care and essential medicines in countries where the public health sector was facing serious underfunding problems and was characterized by a strong emphasis on hospital-based medicine. Thanks to partial cost recovery through users’ financial participation and the involvement of the community, the BI was intended to improve the efficiency and the equity of health-care services in LMICs.[1]

However, utilization of health services declined sharply in the countries that subscribed to the BI, especially among vulnerable populations.[2 3] Measures to ensure that the poorest members of society had access to health services were also seldom found to be effective.[4] The principle of equity in primary health care access was therefore severely compromised.[5 6]

In an attempt to address these failures, some African countries – such as South Africa in 1994 and Uganda in 2001 – decided to eliminate user fees. Others, including Burundi, Liberia and Niger, followed suit. Concerned about the health Millennium Development Goals, many African countries now feel encouraged to provide free care at the point of service,[7 8] and more than 15 countries had implemented such policies by 2011. Several studies have been conducted on exemption policies. In the most

1  
2  
3 recent literature review, Ridde and colleagues identify 32 scientific articles on the  
4 experiences of seven African countries.[9] In addition, many evaluations have been  
5 conducted by non-governmental organizations or on behalf of African governments.  
6  
7 Although the recent proliferation of research comes in response to the urgency of the  
8 debate on user fees, it does not provide the necessary guidance for decision-makers as  
9 they try to adapt these policies to their objectives, target populations and local  
10 contexts.  
11  
12

### 13 **The challenges of evaluating complex social interventions**

14  
15 User fee exemption policies are inherently complex interventions.[10] They are  
16 dependent on the context in which they are implemented, and their implementation is  
17 not standardized.[11] They also have a strong social component, in that they are  
18 designed to promote and protect the health of populations and to reduce inequalities.  
19  
20 Evaluating complex social interventions raises further questions about scientific  
21 research methods. The experimental approach seems to have reached its limits in  
22 understanding these interventions. Because it seeks to control contextual variables and  
23 to ensure that "all else is equal," it does not capture the complex nature of  
24 interventions whose outcomes, by definition, depend on the context in which they are  
25 implemented.[12] By contrast, the constructivist approach perceives social  
26 interventions as a complex process of negotiations between different actors. Such a  
27 vision seldom recognizes the asymmetry of powers between actors in a society, and  
28 often denies the role of structures in human choices.[13] In addition, by refusing any  
29 principle of causality, this approach does not address the question of the outcomes of  
30 an intervention in relation with processes.[14] More and more authors now support a  
31 "contingent" approach, implying that the choice of methods should be guided by the  
32 research question.[12 15]  
33  
34  
35  
36  
37  
38  
39  
40  
41  
42  
43  
44  
45  
46  
47  
48  
49  
50  
51  
52  
53  
54  
55  
56  
57  
58  
59  
60

1  
2  
3 As an alternative to this methodological debate, Chen and Rossi suggest a theory-  
4 based perspective.[16] They believe that theorization allows a better understanding of  
5 how interventions, and social phenomena in general, are supposed to work. Such an  
6 approach, which focuses on "black boxes" of programs would capture the complexity  
7 of social interventions by studying how the different theoretical elements that  
8 compose them are intertwined [17 18] and by reintegrating the context as a key  
9 element in the production of outcomes. In addition, from an *Evidence-based Policy*  
10 (EBP) perspective, shedding light on the multiple logics that underlie policies would  
11 be more useful to decision-makers.  
12

13  
14 By extending the scope of *Evidence-based Medicine*, EBP meets the growing demand  
15 that political decisions be justified through lessons learned from past experiences. The  
16 theory-based approach would allow knowledge of the different contexts in which an  
17 intervention works to be broadened,[18 19] and the accurate level of abstraction with  
18 which to generalize the results of research to be achieved.[20] Thus, it would ensure  
19 the external validity of evaluation studies and make the results transferable to other  
20 contexts. By providing insights into how programs operate and can be implemented in  
21 different contexts, this type of evaluation would be better able to meet the  
22 expectations of decision-makers.[21]  
23

24  
25 Based on this approach, the realistic evaluation suggests that we set aside the  
26 traditional question of the effectiveness of interventions and instead investigate how  
27 they work.[13] The question is no longer: *Do interventions work?* But also: *How? For*  
28 *which populations? And in what contexts?*  
29

### 30 **Syntheses and systematic reviews: the tools of Evidence-based Policy**

31  
32 Two documents have been produced to inform technicians and decision-makers in  
33 charge of formulating and/or implementing exemption policies in their countries. In  
34  
35  
36  
37  
38  
39  
40  
41  
42  
43  
44  
45  
46  
47  
48  
49  
50  
51



1  
2  
3 2008, Save The Children UK (STC-UK) published a guide to help with the planning  
4 and implementation of exemption policies.[22] In 2009, UNICEF published a *Policy*  
5 *Guidance Note*,[23] based on evaluations of exemption policies conducted in several  
6 African countries.[24] These documents have limitations, however. First, the  
7 document by STC-UK is only based on available data on the Ugandan experience,  
8 which limits the scope of its arguments, especially since it specifically states that  
9 these data are not homogeneous. In addition, its recommendations are more common-  
10 sense than the result of a systematic analysis of the variables involved in the  
11 exemption processes. Finally, the recommended steps focus on macro-level planning  
12 and implementation, and leave out key elements for the success of policies of this  
13 scale, such as the mechanisms at work or the contextual elements that come into play.  
14 The UNICEF document partially complements the STC–UK guide because its  
15 recommendations come from a more in-depth analysis, addressing the issue of context  
16 and process of policy formulation more precisely. However, it is a technical "toolbox"  
17 with a relatively normative perspective. While informing decision-makers on what  
18 elements to consider in formulating policies, it does not give them any indication on  
19 how these elements interact with the context.  
20  
21 Ridde and colleagues conducted two literature reviews on exemption policies, using  
22 the *scoping study* method. The first review gives an outline of the scientific  
23 knowledge on this issue and draws attention to research needs.[25] The authors  
24 attempt to make some recommendations; however, this method presents a risk of  
25 over-interpretation of data. It also has methodological limitations: on the one hand,  
26 the quality of the studies was not assessed, while on the other hand, by deciding to  
27 focus solely on scientific publications with peer review, the authors excluded a large  
28 amount of contextual and informal knowledge. The objective of the second literature  
29  
30  
31  
32  
33  
34  
35  
36  
37  
38  
39  
40  
41  
42  
43  
44  
45  
46  
47  
48  
49  
50  
51  
52  
53  
54  
55  
56  
57  
58  
59  
60

1  
2  
3 review is to highlight the pressures exerted by exemption policies on health  
4 systems.[26] The criticisms to the first review also apply here. Additionally, this  
5 second review is not intended to guide decision-makers by responding to their  
6 expectations on the operation and implementation of policies. Therefore, these  
7 documents are of limited interest for policy-makers and international organizations,  
8 especially in a context where the idea of "evidence-based" policy predominates.  
9  
10 Meta-analysis and systematic reviews are the favorite tools of EBP supporters and  
11 decision-makers, for the good reason that "[...] *good evidence syntheses free them up*  
12 *to concentrate on the other aspects that go into policy-making [...]*".[27] A systematic  
13 review was published in 2011 by Lagarde and Palmer evaluating the effectiveness of  
14 different schemes of health-care funding.[28] Only randomized controlled trials,  
15 interrupted time-series studies and controlled before-and-after studies were included,  
16 in accordance with the EPOC (Effective Practice and Organization of Care Group of  
17 the Cochrane Collaboration) method which the authors used to assess the quality of  
18 research design. Based on these criteria, the researchers only included five studies, all  
19 of which were deemed to be of low quality. They explain: "*We considered the*  
20 *evidence on the removal of user fees to be at high risk of bias. In particular, the*  
21 *presence of confounding factors (concurrent policy changes), the lack of reliability of*  
22 *routine data and limited sample sizes weaken the evidence base*".[28] This systematic  
23 review reveals the limitations of the traditional way of synthesizing scientific  
24 knowledge when it comes to complex social interventions. Considering only  
25 knowledge produced through methods limiting bias and random errors,[29] studies  
26 using so-called less robust designs, including research designs used in social sciences,  
27 were excluded even though they provide valuable scientific data.[30] By focusing on  
28 the effectiveness of interventions, such systematic reviews do not take into account  
29  
30  
31  
32  
33  
34  
35  
36  
37  
38  
39  
40  
41  
42  
43  
44  
45  
46  
47  
48  
49  
50  
51  
52  
53  
54  
55  
56  
57  
58  
59  
60

1  
2  
3 the process and contextual elements, which allowed the interventions to produce  
4  
5 outcomes.

6  
7 The need to deal with complex social interventions has led to changes in these  
8  
9 synthesis tools.[31 32] Systematic reviews in fact failed to keep their promises in  
10  
11 terms of transferability to other more social issues.[33] New forms of reviews which  
12  
13 take into account not only qualitative data,[34] but also the combination of  
14  
15 quantitative and qualitative data, are emerging.[35] As noted by Jackson and  
16  
17 colleagues, it is no longer the hierarchy of evidence that must guide the selection of  
18  
19 studies to be included in the review, but their usefulness in answering the research  
20  
21 question.[36] As such, mixed approaches seem promising. Pope and colleagues  
22  
23 identify four mixed review approaches: the narrative approach, the thematic approach,  
24  
25 the EPPI (Evidence for Policy and Practice Information) approach, and the realistic  
26  
27 approach.[37] According to Pluye and colleagues, only the last two involve a  
28  
29 systematic review process.[38] The EPPI approach juxtaposes several reviews to  
30  
31 answer different sub-questions, which together make up a very broad main research  
32  
33 question. The final step of this type of review is to combine the results of the "sub-  
34  
35 reviews" in a meta-synthesis.[33] This process requires a significant amount of time  
36  
37 to complete and the availability of several researchers.[37] Moreover, it is said to  
38  
39 yield limited results in terms of the meta-synthesis. Proposed by Pawson in line with  
40  
41 the realistic evaluation,[13] the realist review aims to develop middle-range theories  
42  
43 that take into account how the context (C) influences mechanisms (M) to produce  
44  
45 outcomes (O).[39 40] That is what Pawson calls C-M-O configurations. It is the only  
46  
47 review that proposes a systematic integration of contextual analysis in order to better  
48  
49 understand how interventions produce outcomes.  
50  
51  
52  
53  
54  
55  
56  
57  
58  
59  
60

## METHODS

### The realist approach

The realist approach provides the possibility of identifying causal patterns underlying complex interventions.[13] Realism assumes that reality exists independently of human constructions, but that it is only perceptible through our senses.[14] This approach postulates the existence of causal patterns, regardless of our understanding. Thus, an intervention does not work in itself; it is the mechanisms that underlie it which act (or fail to act) to produce the observed outcomes. These mechanisms are influenced by the context in which the intervention is implemented. From this perspective, the replication of experiments that try to control contextual elements is futile. We should instead try to observe patterns in the production of outcomes – what Lawson calls "*demi-reg*" (quoted by Pawson, p. 22)[39] – and identify causal arrangements. This is called the "generative" vision of causality. Research aims therefore to identify and describe, in a certain context (C), the mechanisms (M) operated by the intervention to produce its outcomes (O).

The approach proposed by Pawson and Tilley is rooted in a realist perspective of social change.[13] Social phenomena are constructed both by the actions of individuals and their understanding of such phenomena – individuals who in turn are constrained and enabled by social structures. As social systems, social interventions are built from the interplay between agents and structure. We must therefore understand how the agent and the structure interact to produce what characterizes social reality. The manner in which interventions are broken down into context, mechanisms and outcomes should enhance our understanding of these social phenomena. Mechanisms should be understood as elements from the reasoning of actors facing interventions.[10] Realism in social sciences holds that demi-regs are formed from the occurrence of mechanisms: "*Realists thus think of the underlying*

1  
2  
3 *engine of social reality in terms of people's reasoning as well as the resources*  
4 *available to them".[41] The context is similar to, but not limited to, the structure: it is*  
5 *social, cultural, historical or institutional. It is what allows or, conversely, what*  
6 *constrains the action of agents. Indeed, actions are part of a set of social processes that*  
7 *constitutes social reality. Outcomes are the product of the interaction of these*  
8 *mechanisms and the context. Since outcomes are dependent on the context, they are*  
9 *therefore not immutable laws of nature.*

10 CMO configurations are the tools that help explain social change by identifying these  
11 demi-regs (Table 1).[14] The goal is to refine these demi-regs by submitting them to  
12 empirical testing. More precisely, the identification of demi-regs must, according to  
13 Pawson, allow the development of middle-range theories, defined by Merton as  
14 *"theories that lie between the minor but necessary working hypotheses that evolve in*  
15 *abundance during day-to-day research and the all-inclusive systematic efforts to*  
16 *develop a unified theory that will explain all the observed uniformities of social*  
17 *behavior, social organization and social change".[42] Middle-range theories enable*  
18 *us to get to the level of abstraction needed to understand the diversity of outcomes*  
19 *produced in different contexts.[41] The CMO framework ensures the external validity*  
20 *of the research because it lets us move to the necessary level of abstraction for the*  
21 *theory or theories to be useful in other contexts. Blaise and colleagues thus speak of*  
22 *the "plausibility" of the predictive power of these theories.[12] They explain that*  
23 *middle-range theories, rather than interventions per se, are what one should try to*  
24 *replicate in other contexts by improving the design of interventions based on similar*  
25 *mechanisms.*

**Table 1 - Key concepts of the realist approach, adapted from Ridde and colleagues[10]**

|                            |                                                                                                                                                                   |
|----------------------------|-------------------------------------------------------------------------------------------------------------------------------------------------------------------|
| <b>Mechanism</b>           | Element of the reasoning of the actor facing an intervention. A mechanism: 1) is generally hidden; 2) is sensitive to context variations; 3) produces outcomes.   |
| <b>CMO configuration</b>   | Conceptual tool to link the elements of context, mechanisms and outcomes of an intervention.                                                                      |
| <b>Intervention theory</b> | Set of hypotheses that explain how and why the intervention is expected to produce outcomes. It can be broken down in the form of one or more CMO configurations. |
| <b>Middle-range theory</b> | Level of theoretical abstraction that provides an explanation of semi-regularities in the context-mechanism-outcome interactions of a set of interventions.       |

The demi-regs are explained through expanding the conceptual vision, that is moving from a descriptive structure to an explanatory one: "[...] *theory-building moves up and down a ladder of abstraction*".[41] By observing the mechanisms underlying user fee exemption policies in different contexts, it should be possible to see the appearance of demi-regs in the outcomes. The demi-regs can then be synthesized in a typology of "context - mechanism - outcomes" (CMO) families.[18]

### **Research questions**

The following research question, broken down into three specific questions, guides the research: what are the outcomes of user fee exemption policies implemented in Africa, why do they produce such outcomes, and what contextual elements come into play?

### **Study design**

1  
2  
3 A systematic realist review such as that proposed by Pawson and colleagues will be  
4 carried out.[39 40] This will make it possible to integrate knowledge on the  
5 experiences of at least 15 African countries. The study will be conducted in five steps.  
6  
7 The process adopted for this research will not be linear but iterative, based on the  
8 course of action proposed by Pawson.[39]  
9

10  
11  
12  
13  
14 *Step 1: Identifying mechanisms operated by exemption policies.* This step, which is  
15 similar to a logic analysis,[43] has two specific objectives: 1) to highlight the theory  
16 of exemption policies, i.e. how they are supposed to work, for which recipients and  
17 with what anticipated outcomes; and 2) to identify the contextual elements  
18 (institutional, organizational, socio-economic, cultural) that influence the way  
19 mechanisms activated by exemption policies are expected to operate and produce  
20 outcomes. It is therefore a matter of identifying the mechanisms that form the basis of  
21 exemption policies. We will first reconstruct the logic of the issue that these policies  
22 aim to solve (namely the financial barrier to health-care access), and second,  
23 reconstruct the intervention theory of these policies. This will be done in an  
24 exploratory, non-exhaustive and inductive way. Two sources of information will be  
25 sought: 1) official and scientific documentation around the main concepts of  
26 exemption policies, including the determinants of health-care access and equity, and  
27 2) key actors' experiences. These actors (decision-makers and health managers from  
28 Mali, Burkina Faso and Niger) will participate in developing these models. Then, a  
29 framework will be formulated based on the context-mechanism-outcome principle.  
30 This framework will be discussed and validated with local and international  
31 exemption policy experts.  
32  
33  
34  
35  
36  
37  
38  
39  
40  
41  
42  
43  
44  
45  
46  
47  
48  
49  
50  
51  
52

53  
54 *Step 2: Researching primary data.* With regard to the scientific data, the following  
55 document search strategy will be used: 1) the Ovid Medline, Embase, Popline, HMIC,  
56  
57  
58  
59  
60

1  
2  
3 Web of Knowledge, African Healthline, AJOL (African Journals On Line), EconLit,  
4  
5 Business Source Premier databases will be used, as well as the websites of journals  
6  
7 that regularly publish articles on health system financing, such as Health Policy and  
8  
9 Planning, WHO Bulletin, and Social Science and Medicine; 2) combinations of key  
10  
11 words in English and French (Table 2) and their truncations will be entered in these  
12  
13 databases; 3) the relevance of the retrieved documents will be assessed according to  
14  
15 exclusion and inclusion criteria (Table 3); 4) bibliographic references from the  
16  
17 included documents will be reviewed using the "snowballing" technique to identify  
18  
19 additional documents; 5) the ISI Web of Science database will be used to identify  
20  
21 articles citing the included documents. Articles that address the context, mechanisms  
22  
23 or outcomes may be included.  
24  
25  
26  
27

28  
29 **Table 2 - List of key words for the document search strategy**

| AND       |            |            | -OR-        | Themes and expressions |              |
|-----------|------------|------------|-------------|------------------------|--------------|
| -OR-      | -OR-       | -OR-       |             | (gray literature)      |              |
| User fee* | Aboli*     | Developing | Free        | Health                 | Health care  |
| User      | Exempt*    | countr*    | healthcare  | services               | costs        |
| charge*   | Waiv*      | Africa*    | Free care   | accessibility          | Health       |
| Cost-     | Remov*     | Low income | Free        | Health                 | insurance    |
| sharing   | End*       | countr*    | service*    | facilities             | Health       |
| Cost-     | Discontin* | Middle     | Free health | Health                 | expenditure* |
| recovery  | Free       | income     | care        | disparities            | Health       |
| Out-of-   |            | countr*    | Universal   | Health                 | financing    |
| pocket    |            | LMIC*      | access to   | policy                 | National     |
|           |            |            | healthcare  | Health                 | health       |
|           |            |            | Universal   | equity                 | programs     |



|  |  |  |                          |  |  |
|--|--|--|--------------------------|--|--|
|  |  |  | access to<br>health care |  |  |
|--|--|--|--------------------------|--|--|

Because gray literature is a relevant source of information for realist reviews, evaluation reports or policy documents published by African governments, international organizations, non-governmental organizations and consultancy firms, as well as dissertations and theses, may also be included. Our contacts with networks of researchers, decision-makers and other stakeholders in North America, Europe and Africa will facilitate the collection of these documents. The Database on African Theses and Dissertations (DATAD) and Dissertations and Thesis will also be searched.

The search for new documents will end at the point of saturation, i.e. when the research yields no more new sources of information. References will be compiled in Mendeley, a reference manager.

### Table 3 - Inclusion and exclusion criteria

|                                                                                                                                                                                                                                                                                                                                                                                                                                                                         |
|-------------------------------------------------------------------------------------------------------------------------------------------------------------------------------------------------------------------------------------------------------------------------------------------------------------------------------------------------------------------------------------------------------------------------------------------------------------------------|
| <p><b>Inclusion criteria:</b></p> <ul style="list-style-type: none"> <li>• The document's main focus is health.</li> <li>• The document deals with at least one African country.</li> <li>• The document addresses the issue of user fee exemption in the health sector<br/>OR the research takes place in the context of user fee exemption in the health sector.</li> <li>• The user fee exemption policy dealt with in the document is a national policy.</li> </ul> |
| <p><b>Exclusion criteria:</b></p> <ul style="list-style-type: none"> <li>• The document's main theme is not health.</li> </ul>                                                                                                                                                                                                                                                                                                                                          |

- The document does not deal with at least one African country.
- The document addresses a different issue than the issue of user fee exemption in the health sector.
- The document focuses on user fee exemption in the context of cost recovery policies (waivers).
- The document focuses on user fee exemption as part of a program run by a non-governmental organization.

*Step 3: Assessing the quality of studies.* Unlike traditional systematic reviews, there is no need to assess study designs based on the hierarchy of evidence in a realist review. Quality assessment is done instead in a heuristic perspective to enrich the CMO configurations and should answer the question: "*Is this study good enough to provide some evidence that will contribute to the synthesis?*"[39] Each study should be assessed according to how it clarifies the configurations. Therefore, the unit of analysis is not the study itself, but fragments of information that are produced.[44] However, this approach does not ensure a transparent selection of articles. Some authors have assessed the methodological quality of the articles in their realist review, but failed to specify which tools they used.[45 46] The Mixed Method Appraisal Tool (MMAT) proposed by Pluye and colleagues[47] seems an appropriate compromise between the need for a rigorous and transparent quality assessment and the need to consider the data according to their relevance for the development of middle-range theories. Indeed, this tool makes it possible to describe the methodology of qualitative, quantitative and mixed studies based on 19 separate items. For this review, studies considered to be of too low quality may be excluded (the minimum quality standard will be determined considering the overall quality of the studies). To

1  
2  
3 facilitate this process, a summary table will specify the authors, objectives, type of  
4  
5 study, different methodological aspects, conclusions and assessment made according  
6  
7 to the MMAT.  
8

9  
10 *Step 4: Extracting the data.* The documents included in the review will be compiled  
11  
12 into the QDA Miner<sup>®</sup> software to facilitate their organization and analysis. This  
13  
14 software can encode and annotate a large number of documents, extract relevant data  
15  
16 and link emerging themes. The analytical framework developed in step 1 will be used  
17  
18 to analyze the documents and will be further specified in an iterative manner so as to  
19  
20 integrate new explanatory elements. More specifically, data from which new  
21  
22 categories are created and differences between categories will be reported.  
23

24  
25 *Step 5: Synthesizing the data.* Each primary study will be "*inspected for evidence,*  
26  
27 *according to how it supports, weakens, modifies, supplements, reinterprets or*  
28  
29 *refocuses the preliminary theory*".[39] By applying, completing and clarifying the  
30  
31 analytical framework, we can take a critical look at the contribution of each study to  
32  
33 the initial theory. It will thus be possible to specify configuration elements (CMO)  
34  
35 and develop a middle-range theory. This process will follow the abductive approach  
36  
37 that Blom and Morén, citing Danermark, explain: "*Abduction means that single events*  
38  
39 *or occurrences – by means of concepts, theory and models – are described and*  
40  
41 *interpreted as expression of more general phenomena*".[48] Each study will help  
42  
43 clarify or reformulate the CMO configurations in order to take into account potential  
44  
45 contradictory elements. The middle-range theory will finally be put into words, as  
46  
47 well as modeled to highlight the links between contextual elements, mechanisms and  
48  
49 outcomes.  
50  
51

#### 52 53 54 **Internal and external validity**

1  
2  
3 The internal validity of the research is ensured by the in-depth study of the theoretical  
4 articulation of user fee exemption policies. The construction of explanations so as to  
5 make "sense" of exemption policies, through an iterative process between empirical  
6 data and construction of CMO configurations, also contributes to strengthening  
7 internal validity. The external validity of the research stems from the principle of  
8 explanation discussed above, as well as the approach based on the CMO  
9 configurations.[49] Taking the context into account in the production of outcomes  
10 increases the generalization potential of the study. Indeed, developing middle-range  
11 theories allows a better understanding of the elements involved in the production of  
12 outcomes. A research logbook will document the research approach step by step,  
13 along with any adjustments and methodological choices made. This logbook will  
14 contain methodological as well as theoretical notes. This will help ensure the  
15 reliability of the research results.[50] A glossary will be prepared to clarify the  
16 terminology used in the research.  
17  
18  
19  
20  
21  
22  
23  
24  
25  
26  
27  
28  
29  
30  
31  
32  
33  
34

## 35 **DISCUSSION**

### 36 **Importance of the research**

37  
38 The results of the proposed research may be useful to African decision-makers who  
39 would be willing to implement exemption policies in their countries and to  
40 government and international agencies that wish to support them. More than 30  
41 countries have adopted the BI and are thus potential users of the results of this  
42 research, especially in the context of an emerging consensus around these issues  
43 within the international community.[8 51] In addition, this study is part of a broader  
44 research movement initiated around new practices of user fee exemptions in LMICs,  
45 but which mainly focuses on outcomes at the expense of other pieces of knowledge  
46  
47  
48  
49  
50  
51  
52  
53  
54  
55  
56  
57  
58  
59  
60

1  
2  
3 that will be studied within this research. Once the review has been completed, a  
4  
5 realistic evaluation could be undertaken to test the new middle-range theory.  
6

7  
8 Few researchers, including those in the field of public health, have used the realist  
9  
10 approach to synthesize the literature. This is doubtless due to both methodological and  
11  
12 conceptual challenges.[10] A secondary objective is therefore to pursue the reflections  
13  
14 initiated on the realist review in order to facilitate its use for the benefit of research on  
15  
16 health policies.[52]  
17

### 18 **Knowledge-sharing strategy**

19  
20 To promote the use of the knowledge generated through this research, three activities  
21  
22 will be implemented. First, a restitution workshop will be organized at the end of the  
23  
24 research with key stakeholders. Then, the RESAO,[53] a West African network of  
25  
26 researchers and decision-makers, will be involved in the research. Its role will be to  
27  
28 mobilize key informants at step 1 and for the restitution workshop, and also to provide  
29  
30 technical expertise on exemption policies. Finally, a policy brief in French and in  
31  
32 English presenting the research results will be produced and broadcast via the RESAO  
33  
34 and the Financial Access to Health Services Community of Practice.[54]  
35  
36  
37

### 38 **Ethical considerations**

39  
40 The study has been approved by the Ethics Committee of the CHUM Research  
41  
42 Centre. It received funding from the Canadian Institutes of Health Research.  
43  
44  
45  
46  
47  
48  
49  
50  
51  
52  
53  
54  
55  
56  
57  
58  
59  
60

## ACKNOWLEDGEMENTS

ER is a Ph.D. candidate in public health at Montreal University (Canada), and a fellow of the Strategic Training Program in Global Health Research, a partnership of the Canadian Institutes of Health Research and the Québec Population Health Research Network. VR is a New Investigator of the Canadian Institutes for Health Research.

## COMPETING INTERESTS

None.

## FUNDING

The project is funded by the Canadian Institutes for Health Research under the financing opportunity « Knowledge synthesis » (NRF 102072).

## Reference list

- 1 Knippenberg R, Alihonou E, Soucat A, et al. Implementation of the Bamako Initiative: Strategies in Benin and Guinea. *Int J Health Plann Manage* 1997;12(S1):S29-S47 doi:10.1002/(SICI)1099-1751(199706)12:1+<S29::AID-HPM465>3.0.CO;2-U
- 2 Gilson L, Mills A. Health sector reforms in sub-Saharan Africa: lessons of the last 10 years. *Health Policy* 1995;32(1-3):215-43
- 3 James C, Hanson K, McPake B, et al. To Retain or Remove User Fees? Reflections on the current debate. *Appl Health Econ Health Policy* 2006;5(3):137-53
- 4 Laterveer L, Munga M, Shwerzel P. Equity implications of health sector user fees in Tanzania. Do we retain the user fee or do we set the future user f(r)ee? Leusden: ETC Crystal for REPOA / Partners in International Health, 2004:36.
- 5 Gilson L. The lessons of user fee experience in Africa. *Health Policy Plan* 1997;12(4):273-85
- 6 Ridde V, Girard JE. Douze ans après l'initiative de Bamako : constats et implications politiques pour l'équité d'accès aux services de santé des indigents africains. *Santé Publique* 2004;1(41):37-51 doi:10.3917/spub.041.0037
- 7 Sambo LG, Kirigia JM, Ki-Zerbo G. Perceptions and viewpoints on proceedings of the Fifteenth Assembly of Heads of State and Government of the African Union Debate on Maternal, Newborn and Child Health and

- 1  
2  
3 Development, 25–27 July 2010, Kampala, Uganda. *BMC Proc* 2011;5(Suppl  
4  
5 5)(S1). <http://www.biomedcentral.com/1753-6561/5/S5/S1> (accessed 29  
6  
7 November 2011). doi:10.1186/1753-6561-5-S5-S1  
8  
9  
10 8 Commission for Africa. Still our common interest: Commission for Africa  
11  
12 Report 2010. In: Commission for Africa, editor. *Commission for Africa*.  
13  
14 London: Commission for Africa, 2010:68.  
15  
16 9 Ridde V, Robert E, Meessen B. Les pressions exercées par l'abolition du  
17  
18 paiement des soins sur les systèmes de santé. In: Health systems financing,  
19  
20 editor. *World Health Report (2010) Background Paper, 18*. Geneva:  
21  
22 World Health Organization, 2010:p.43.  
23  
24  
25 10 Ridde V, Robert E, Guichard A, et al. L'approche Realist à l'épreuve du  
26  
27 réel : de quelques défis méthodologiques. *Canadian Journal of Program*  
28  
29 *Evaluation* 2012;26(3)  
30  
31  
32 11 Egan M, Bambra C, Petticrew M, et al. Reviewing evidence on complex  
33  
34 social interventions: appraising implementation in systematic reviews of  
35  
36 the health effects of organisational-level workplace interventions. *J*  
37  
38 *Epidemiol Community Health* 2009;63(1):4-11  
39  
40 doi:10.1136/jech.2007.071233 [published Online First: 21 August 2008  
41  
42  
43 12 Blaise P, Marchal B, Lefèvre P, et al. Au-delà des méthodes  
44  
45 expérimentales, l'approche réaliste en évaluation. In: Potvin L, Moquet M-  
46  
47 J, Jones CM, eds. *Guide d'aide à l'action : inégalités sociales de santé*.  
48  
49 Saint-Denis: Institut national de prévention et d'éducation pour la santé  
50  
51 2010:285-96.  
52  
53  
54 13 Pawson R, Tilley N. *Realistic Evaluation*. London: Sage Publications 1997.  
55  
56  
57  
58  
59  
60



- 1  
2  
3 14 Julnes G, Mark MM. Evaluation as Sensemaking: Knowledge Construction  
4 in a Realist World. In: Henry GT, Julnes G, Mark MM, eds. *Realist*  
5 *Evaluation: An Emerging Theory in Support of Practice*. San Francisco:  
6 New Directions for Evaluation (no.78) 1998:33-52.  
7  
8  
9  
10  
11 15 Chen HT. The Roots of Theory-Driven Evaluation. Current Views and  
12 Origins. In: Alkin MC, ed. *Evaluation roots. Tracing Theorists' Views and*  
13 *Influences*. London: Sage Publications 2004:132-52.  
14  
15  
16  
17  
18 16 Chen H-T, Rossi PH. The Multi-Goal, Theory-Driven Approach to  
19 Evaluation: A Model Linking Basic and Applied Social Science. *Social*  
20 *Forces* 1980;59(1):106-22  
21  
22  
23  
24  
25 17 Stame N. Theory-Based Evaluation and Types of Complexity. *Evaluation*  
26 2004;10(1):58-76 doi:10.1177/1356389004043135  
27  
28  
29  
30 18 Pawson R. Nothing as practical as Good Theory. *Evaluation*  
31 2003;9(4):471-90 doi:10.1177/1356389003094007  
32  
33  
34 19 Pawson R, Sridharan S. Theory-driven evaluation of public health  
35 programs. In: Killoran A, Mike K, eds. *Evidence-based Public Health:*  
36 *Effectiveness and efficiency*. New York: Oxford University Press 2010:43-  
37 62.  
38  
39  
40  
41  
42  
43 20 Chen H-T. Generalization Evaluation. In: Chen H-T, ed. *Theory-driven*  
44 *Evaluation*. Newbury Park: Sage Publications 1990:219-54.  
45  
46  
47 21 Chen H-T. Theory-driven Evaluations: Need, Difficulties, and Options.  
48 *American Journal of Evaluation* 1994;15(1):79-82  
49 doi:10.1177/109821409401500109  
50  
51  
52  
53 22 McPake B, Schmidt A, Araujo E, et al. Freeing up Healthcare. A guide to  
54 removing user fees. London: Save The Children UK, 2008:44.  
55  
56  
57  
58  
59  
60

- 1  
2  
3 23 Meessen B. Removing User Fees in the Health Sector in Low-Income  
4  
5 Countries: A Policy Guidance Note for Programme Managers. In:  
6  
7 UNICEF, editor. *Health Section Working Paper*. New York: UNICEF,  
8  
9 2009:38.  
10  
11  
12 24 Meessen B, Hercot D, Noirhomme M, et al. Removing user fees in the  
13  
14 health sector: a review of policy processes in six sub-Saharan African  
15  
16 countries. *Health Policy Plan* 2011;26(Suppl 2):ii16-ii29  
17  
18 doi:10.1093/heapol/czr062  
19  
20  
21 25 Ridde V, Morestin F. A scoping review of the literature on the abolition of  
22  
23 user fees in healthcare services in Africa. *Health Policy Plan*  
24  
25 2011;26(1):1-11 doi:10.1093/heapol/czq021 [published Online First: 14  
26  
27 June 2010  
28  
29  
30 26 Ridde V, Robert E, Meessen B. Les pressions exercées par l'abolition du  
31  
32 paiement des soins sur les systèmes de santé. In: WHO Department of  
33  
34 Health System Financing, editor. *Background Paper for the World Health*  
35  
36 *Report 2010*. Geneva: WHO, 2010:p.43.  
37  
38  
39 27 Sheldon T. Making evidence synthesis more useful for management and  
40  
41 policy-making. *J Health Serv Res Policy* 2005;10(S1):1-5  
42  
43 doi:10.1258/1355819054308521  
44  
45  
46 28 Lagarde M, Palmer N. The impact of user fees on access to health services  
47  
48 in low- and middle-income countries. *Cochrane Database Syst Rev* 2011  
49  
50 Apr 13(4). <http://dx.doi.org/10.1002/14651858.CD009094> (accessed 29  
51  
52 November 2011). doi:10.1002/14651858.CD009094  
53  
54  
55  
56  
57  
58  
59  
60

- 1  
2  
3 29 Cook DJ, Mulrow CD, Haynes RB. Systematic Reviews: Synthesis of Best  
4 Evidence for Clinical Decisions. *Ann Intern Med* 1997;126(5):376-80  
5  
6 doi:10.1059/0003-4819-126-5-199703010-00006  
7  
8  
9  
10 30 Gilson L, Hanson K, Sheikh K, et al. Building the Field of Health Policy  
11 and Systems Research: Social Science Matters. *PLoS Med*  
12  
13 2011;8(8):e1001079 doi:10.1371/journal.pmed.1001079 [published Online  
14  
15 First: 23 August 2011  
16  
17  
18 31 Shepperd S, Lewin S, Straus S, et al. Can We Systematically Review  
19  
20 Studies That Evaluate Complex Interventions? *PLoS Med* 2009 Aug  
21  
22 11;6(8). <http://dx.plos.org/10.1371/journal.pmed.1000086> (accessed 29  
23  
24 November 2011). doi:10.1371/journal.pmed.1000086  
25  
26  
27 32 Petticrew M. Systematic reviews in public health: old chestnuts and new  
28  
29 challenges. *Bull World Health Organ* 2009;87(3):163-63A  
30  
31 doi:10.2471/BLT.09.063719  
32  
33  
34 33 White DG. Evaluating evidence and making judgements of study quality:  
35  
36 loss of evidence and risks to policy and practice decisions. *Critical Public*  
37  
38 *Health* 2001;11(1):3 - 17 doi:10.1080/09581590010028228  
39  
40  
41 34 Barnett-Page E, Thomas J. Methods for the synthesis of qualitative  
42  
43 research: a critical review. *BMC Med Res Methodol* 2009 August 11;9(59).  
44  
45 <http://www.biomedcentral.com/1471-2288/9/59> (accessed 29 November  
46  
47 2011). doi:10.1186/1471-2288-9-59  
48  
49  
50 35 Dixon-Woods M, Agarwal S, Jones D, et al. Synthesising qualitative and  
51  
52 quantitative evidence: a review of possible methods. *J Health Serv Res*  
53  
54 *Policy* 2005;10(1):45-53  
55  
56  
57  
58  
59  
60

- 1  
2  
3 36 Jackson N, Waters E, Guidelines for Systematic Reviews of Health  
4  
5 Promotion and Public Health Interventions Taskforce. The challenges of  
6  
7 systematically reviewing public health interventions. *J Public Health (Oxf)*  
8  
9 2004;26(3):303-07 doi:10.1093/pubmed/fdh164  
10  
11  
12 37 Pope C, Mays N, Popay J. *Synthesizing Qualitative and Quantitative*  
13  
14 *Health Evidence: A guide to methods*. Maidenhead: McGraw-Hill  
15  
16 Education 2007.  
17  
18  
19 38 Pluye P, Gagnon MP, Griffiths F, et al. A scoring system for appraising  
20  
21 mixed methods research, and concomitantly appraising qualitative,  
22  
23 quantitative and mixed methods primary studies in Mixed Studies  
24  
25 Reviews. *Int J Nurs Stud* 2009;46(4):529-46 doi:S0020-7489(09)00014-5  
26  
27 [pii]10.1016/j.ijnurstu.2009.01.009 [published Online First: 23 February  
28  
29 2009  
30  
31  
32 39 Pawson R. *Evidence-based Policy. A Realist Perspective*. London: Sage  
33  
34 Publications 2006.  
35  
36  
37 40 Pawson R, Greenhalgh T, Harvey G, et al. Realist review – a new method  
38  
39 of systematic review designed for complex policy interventions. *J Health*  
40  
41 *Serv Res Policy* 2005;10(S1):21-34 doi:10.1258/1355819054308530  
42  
43  
44 41 Pawson R. Middle-range realism. *European Journal of Sociology*  
45  
46 2000;41(2):283-325 doi:10.1017/S0003975600007050  
47  
48  
49 42 Merton RK. On sociological theories of the middle range. In: Merton RK,  
50  
51 ed. *Social theory and social structure*. New York: Free Press 1968:39-72.  
52  
53  
54 43 Rossi PH, Lipsey MW, Freeman HE. Expressing and Assessing Program  
55  
56 Theory. In: Rossi PH, ed. *Evaluation: A Systematic Approach*. Thousand  
57  
58 Oaks: Sage 2004:133-52.  
59  
60

- 1  
2  
3 44 Pawson R. Digging for nuggets: how 'bad' research can yield 'good'  
4  
5 evidence. *Realist Synthesis: Supplementary reading 6*, 2006:15.  
6  
7 45 Clamp S, Keen J. Electronic health records: Is the evidence base any use?  
8  
9 *Med Inform Internet Med* 2007 Mar;32(1).  
10  
11 <http://www.ingentaconnect.com/content/apl/tmif/2007/00000032/00000001/art00002> (accessed 28 November 2011).  
12  
13  
14  
15  
16 doi:10.1080/14639230601097903  
17  
18 46 Dieleman M, Gerretsen B, van der Wilt GJ. Human resource management  
19  
20 interventions to improve health workers' performance in low and middle  
21  
22 income countries: a realist review. *Health Res Policy Syst* 2009 Apr  
23  
24 17;7(7). <http://www.health-policy-systems.com/content/7/1/7> (accessed 29  
25  
26 November 2011). doi:10.1186/1478-4505-7-7  
27  
28  
29 47 Pluye P, Robert E, Cargo M, et al. Proposal: A mixed methods appraisal  
30  
31 tool for systematic mixed studies reviews. Montréal: McGill University,  
32  
33 2011.  
34  
35 48 Blom B, Morén S. Analysis of generative mechanisms. *Journal of Critical*  
36  
37 *Realism* 2011;10(1):60-79  
38  
39 49 Chen H-T, Rossi PH. The theory-driven approach to validity. *Evaluation*  
40  
41 *and Program Planning* 1987;10(1):95-103 doi:10.1016/0149-  
42  
43 7189(87)90025-5  
44  
45  
46 50 Devers KJ. How will we know "good" qualitative research when we see it?  
47  
48 Beginning the dialogue in health services research. *Health Serv Res*  
49  
50 1999;34(5):1153-88  
51  
52  
53  
54  
55  
56  
57  
58  
59  
60

- 1  
2  
3 51 Yates R. Universal health care and the removal of user fees. *Lancet*  
4  
5 2009;373(9680):2078-81 doi:10.1016/S0140-6736(09)60258-0 [published  
6  
7 Online First: 9 April 2009  
8  
9  
10 52 Greenhalgh T, Wong G, Westhorp G, et al. Protocol - realist and meta-  
11  
12 narrative evidence synthesis: Evolving Standards (RAMESES). *BMC Med*  
13  
14 *Res Methodol* 2011 Aug 16;11(115). [http://www.biomedcentral.com/1471-](http://www.biomedcentral.com/1471-2288/11/115)  
15  
16 [2288/11/115](http://www.biomedcentral.com/1471-2288/11/115) (accessed 29 November 2011). doi:10.1186/1471-2288-11-  
17  
18 115  
19  
20  
21 53 RESAO. Bienvenue sur le site de RESAO. In: RESAO, editor. RESAO ed:  
22  
23 RESAO, 2011.  
24  
25 54 FACOP. About FACOP, 2011.  
26  
27  
28  
29  
30  
31  
32  
33  
34  
35  
36  
37  
38  
39  
40  
41  
42  
43  
44  
45  
46  
47  
48  
49  
50  
51  
52  
53  
54  
55  
56  
57  
58  
59  
60
